# Supplementary material for: Fine Dissection of Human Mitochondrial DNA Haplogroup HV Lineages Reveals Paleolithic Signatures from European Glacial Refugia
Source: PubMed Central journal article supplement (PMC4671665; doi:10.1371/journal.pone.0144391), 2015-12-07

**S2 Fig. Phylogenetic tree with all the 316 sequences of the dataset.**  
Realized in BEAST.

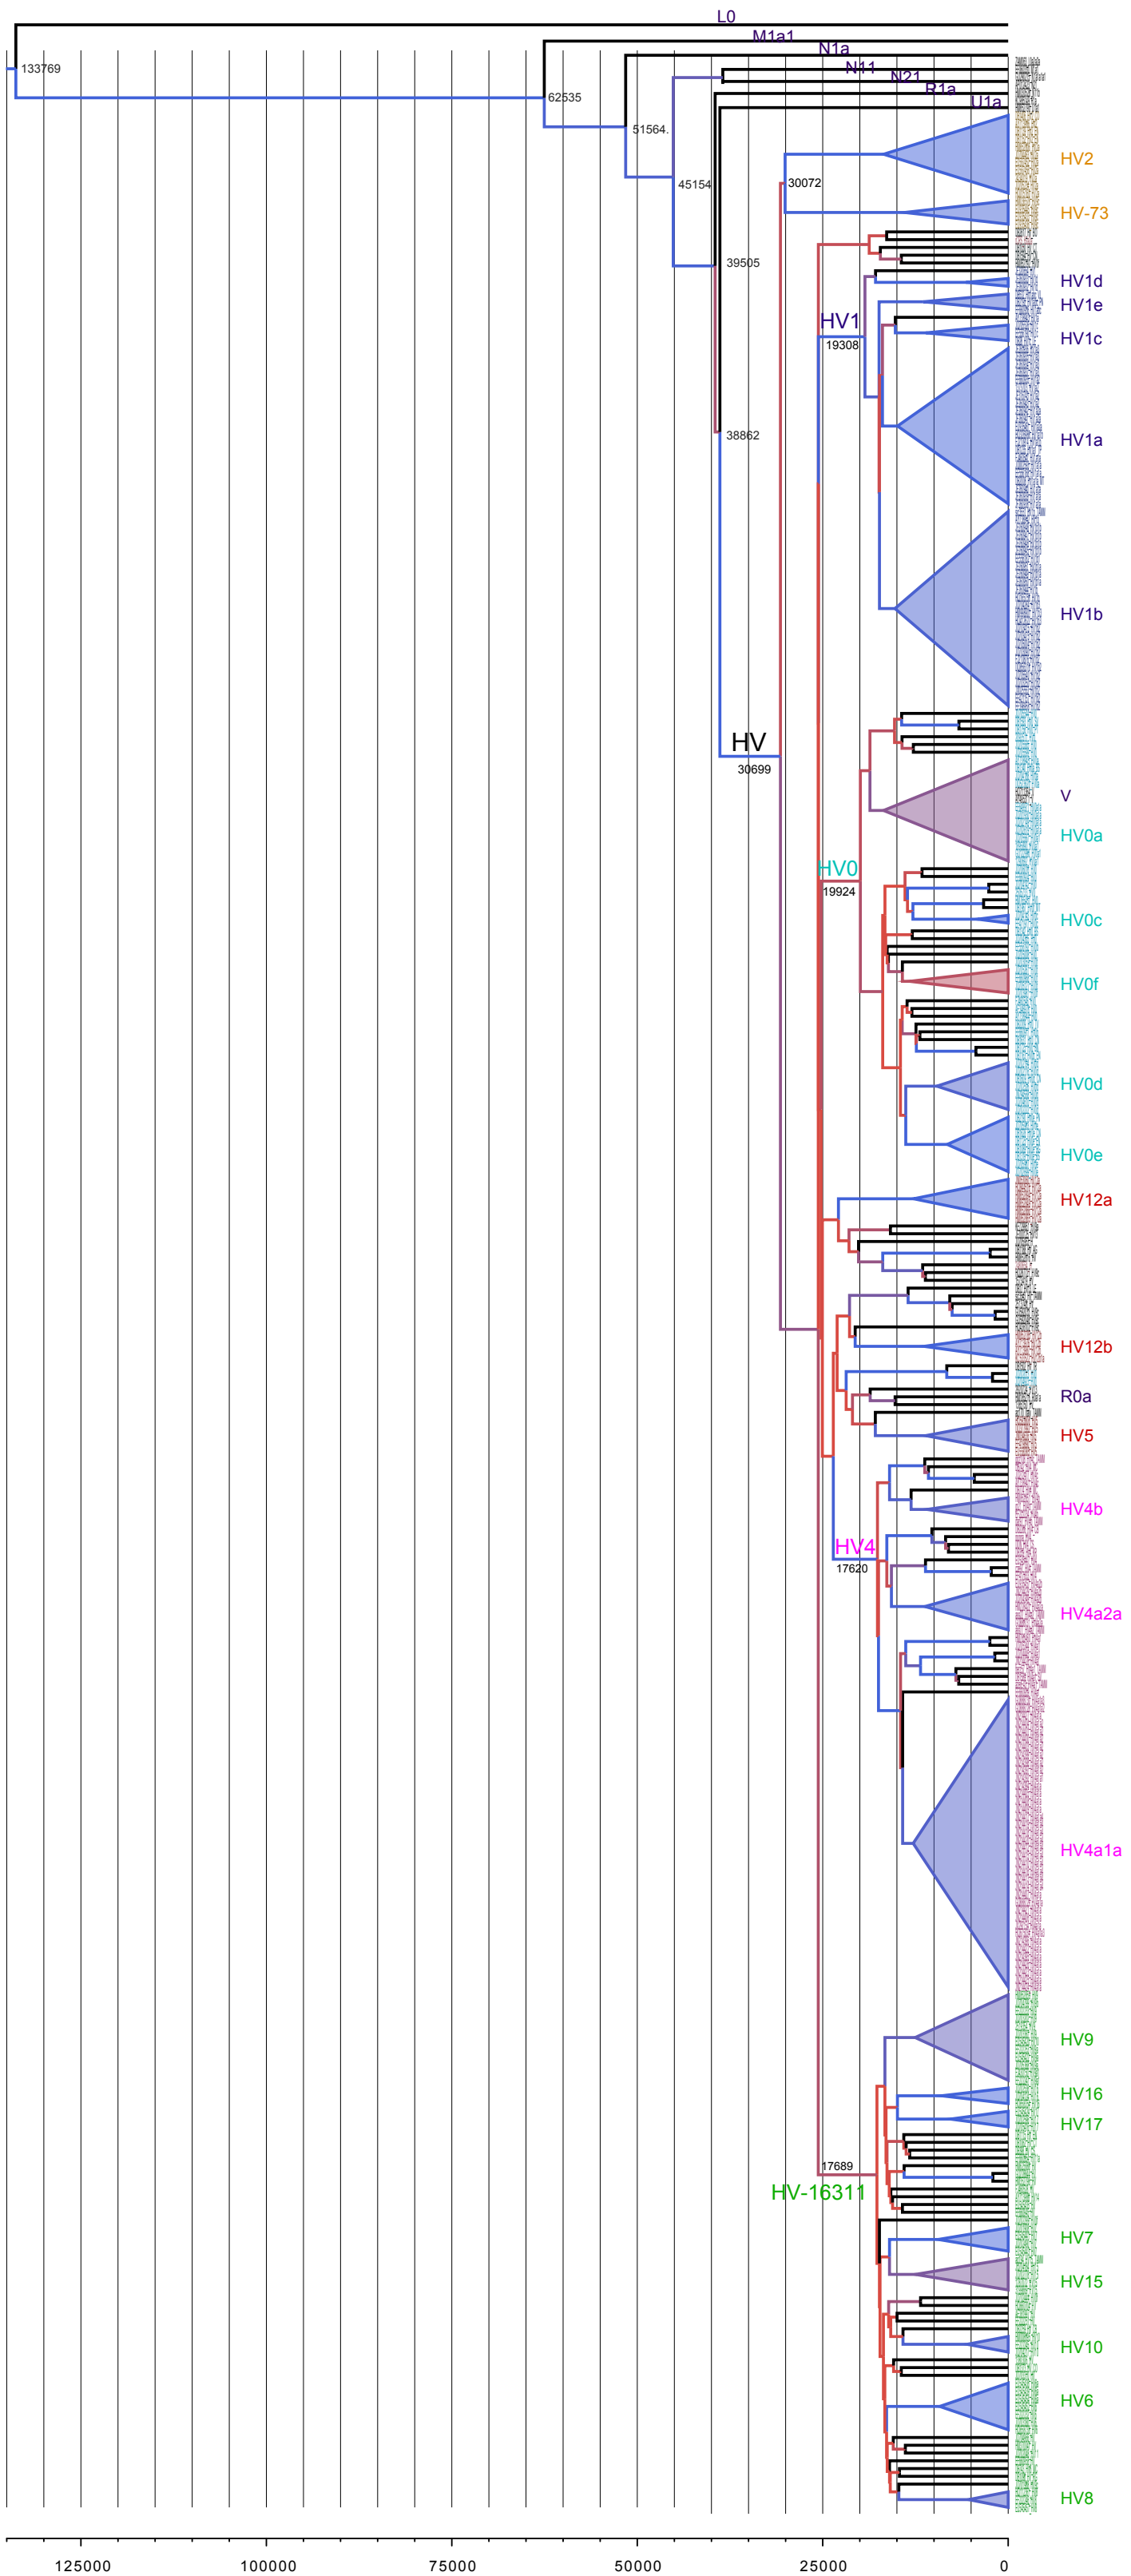

Supplement: pone.0144391.s002.pdf [file pone.0144391.s002.pdf]
