# Supplementary material for: Fine Dissection of Human Mitochondrial DNA Haplogroup HV Lineages Reveals Paleolithic Signatures from European Glacial Refugia
Source: PubMed Central journal article supplement (PMC4671665; doi:10.1371/journal.pone.0144391), 2015-12-07
Supplement: pone.0144391.s003.pdf [file pone.0144391.s003.pdf]

**S3 Fig. Phylogenetic tree with all the 316 sequences of the dataset.**

Realized in BEAST, after imposing monophyly of major haplogroups branches HV0, HV1, HV4,

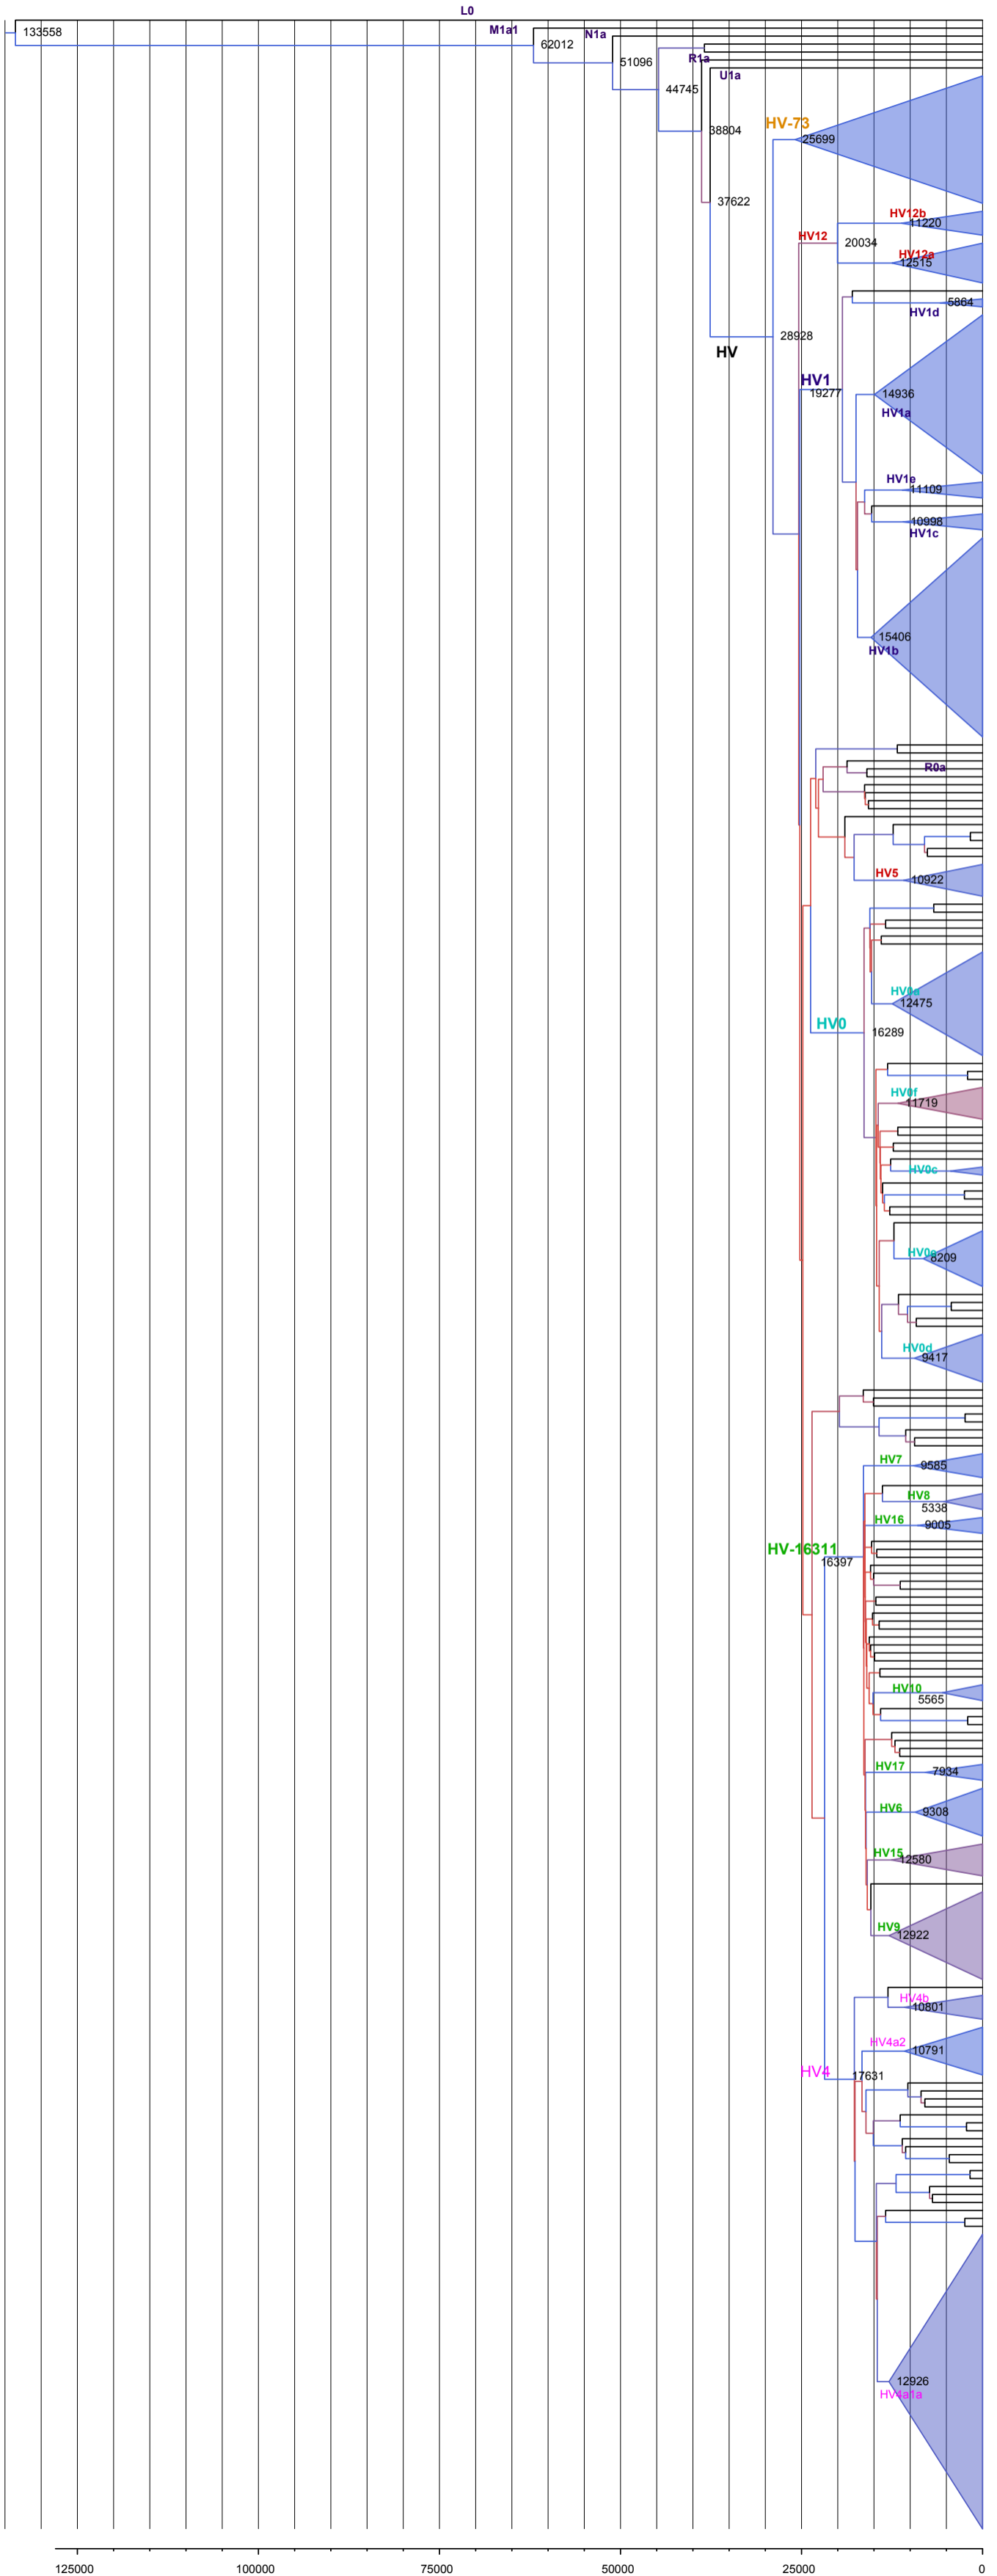

125000

100000

75000

50000

25000

0
