# Supplementary material for: Fine Dissection of Human Mitochondrial DNA Haplogroup HV Lineages Reveals Paleolithic Signatures from European Glacial Refugia
Source: PubMed Central journal article supplement (PMC4671665; doi:10.1371/journal.pone.0144391), 2015-12-07

**S4 Fig. CA analysis of haplogroup (major nodes) frequencies for geographic areas present in the dataset.**

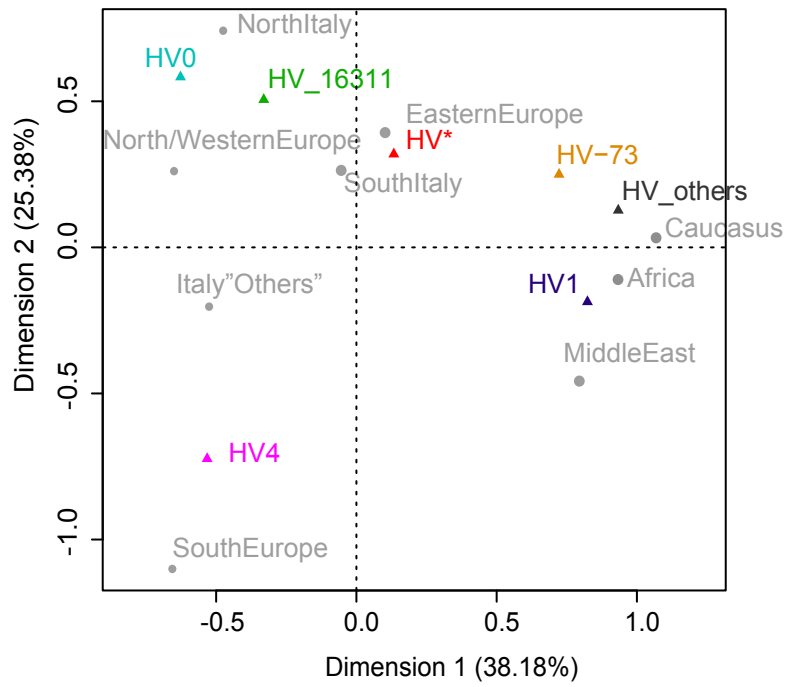

Supplement: pone.0144391.s004.pdf [file pone.0144391.s004.pdf]
