# Supplementary material for: Fine Dissection of Human Mitochondrial DNA Haplogroup HV Lineages Reveals Paleolithic Signatures from European Glacial Refugia
Source: PubMed Central journal article supplement (PMC4671665; doi:10.1371/journal.pone.0144391), 2015-12-07

**S5 Fig. Median-joining networks for major lineage blocks: Haplogroup HV4.**  
 Mutations are given equal weight.

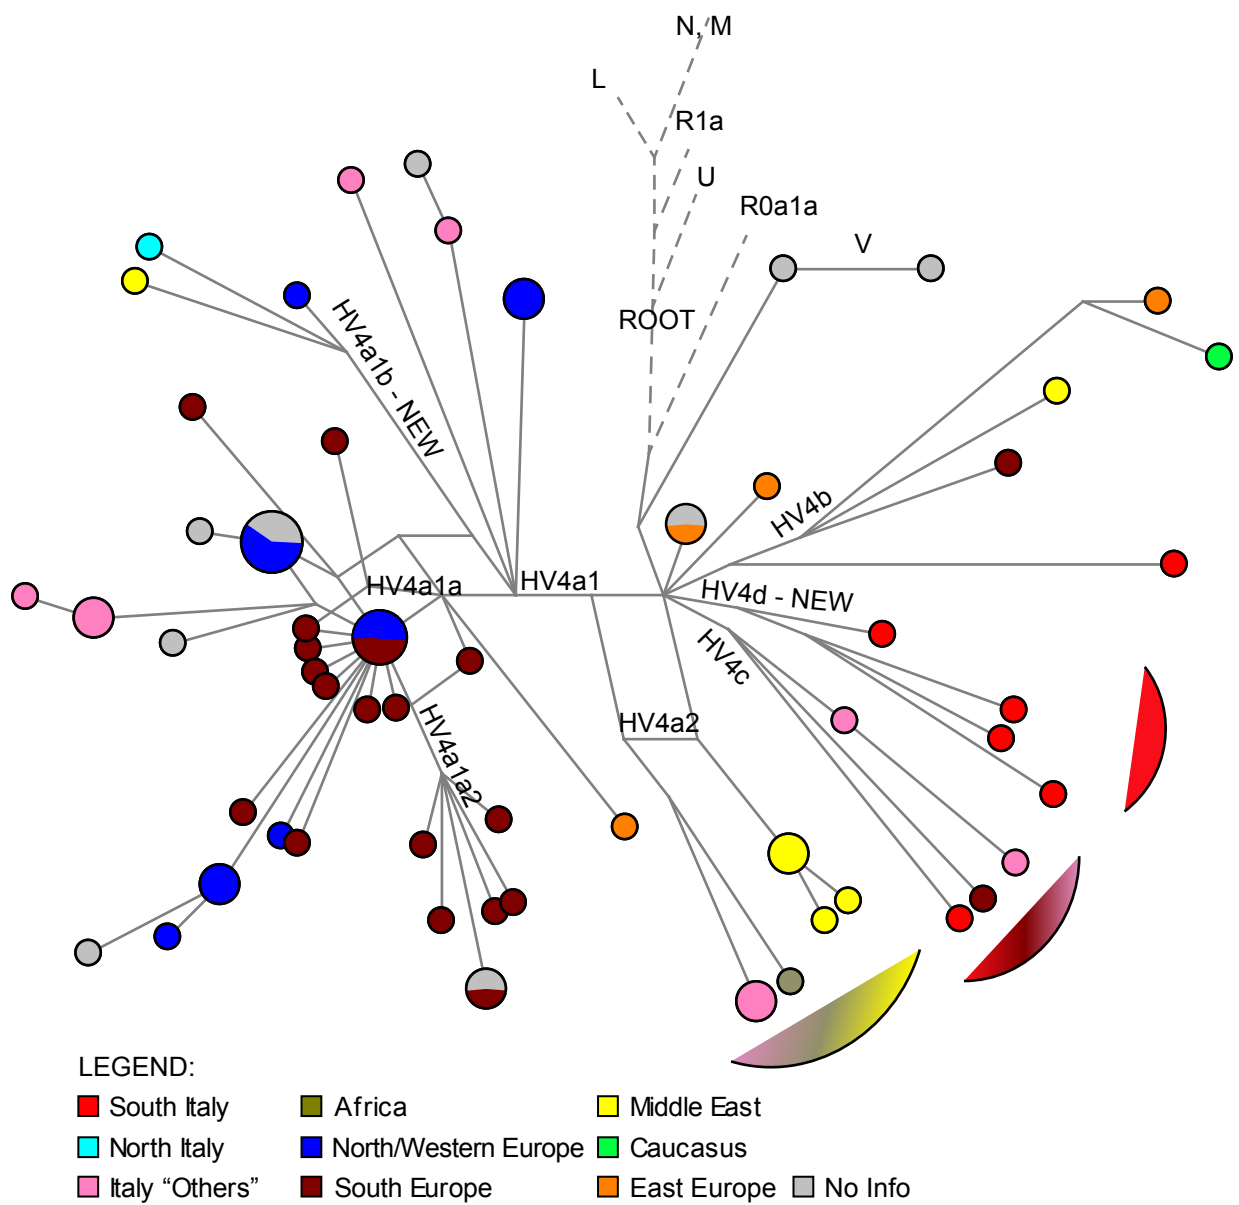

Supplement: pone.0144391.s005.pdf [file pone.0144391.s005.pdf]
