# Supplementary material for: Fine Dissection of Human Mitochondrial DNA Haplogroup HV Lineages Reveals Paleolithic Signatures from European Glacial Refugia
Source: PubMed Central journal article supplement (PMC4671665; doi:10.1371/journal.pone.0144391), 2015-12-07
Supplement: pone.0144391.s006.pdf [file pone.0144391.s006.pdf]

**S6 Fig. Median-joining networks for major lineage blocks: Haplogroup HV0.**  
 Mutations are given equal weights

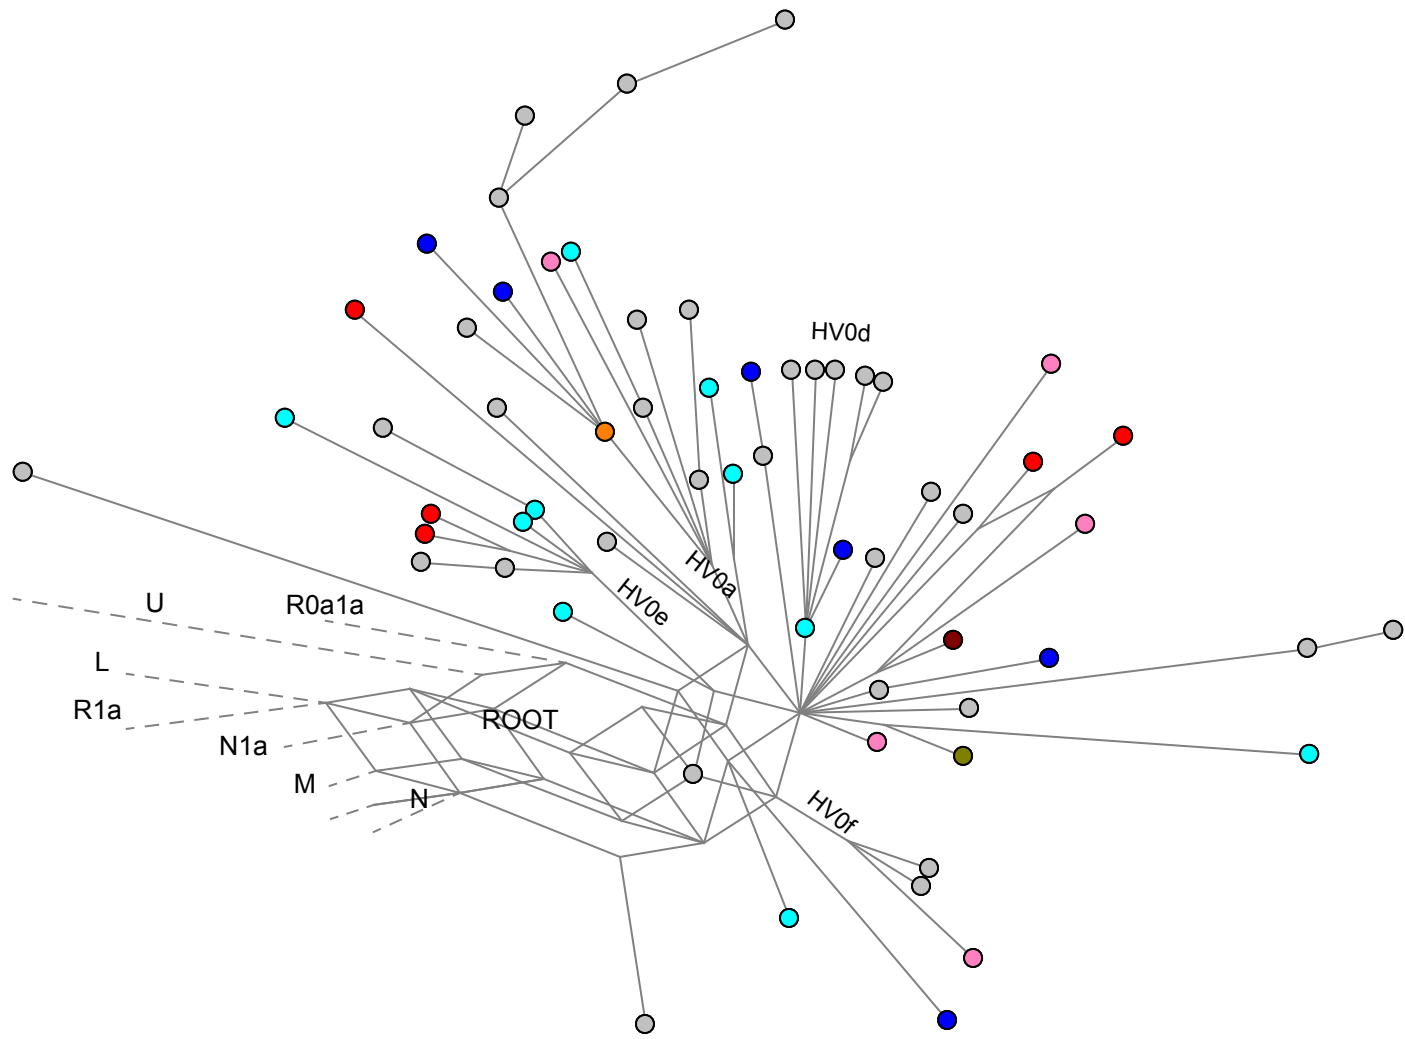

LEGEND:

- |                  |                        |               |
|------------------|------------------------|---------------|
| ■ South Italy    | ■ Africa               | ■ No Info     |
| ■ North Italy    | ■ North/Western Europe | ■ East Europe |
| ■ Italy "Others" | ■ South Europe         |               |
