# Supplementary material for: Fine Dissection of Human Mitochondrial DNA Haplogroup HV Lineages Reveals Paleolithic Signatures from European Glacial Refugia
Source: PubMed Central journal article supplement (PMC4671665; doi:10.1371/journal.pone.0144391), 2015-12-07
Supplement: pone.0144391.s010.pdf [file pone.0144391.s010.pdf]

**S10 Fig. Median-joining networks for major lineage blocks: haplogroup HV-73, HV5, HV12, HV13, HV18 and HV\*.**  
 Mutations are given equal weights

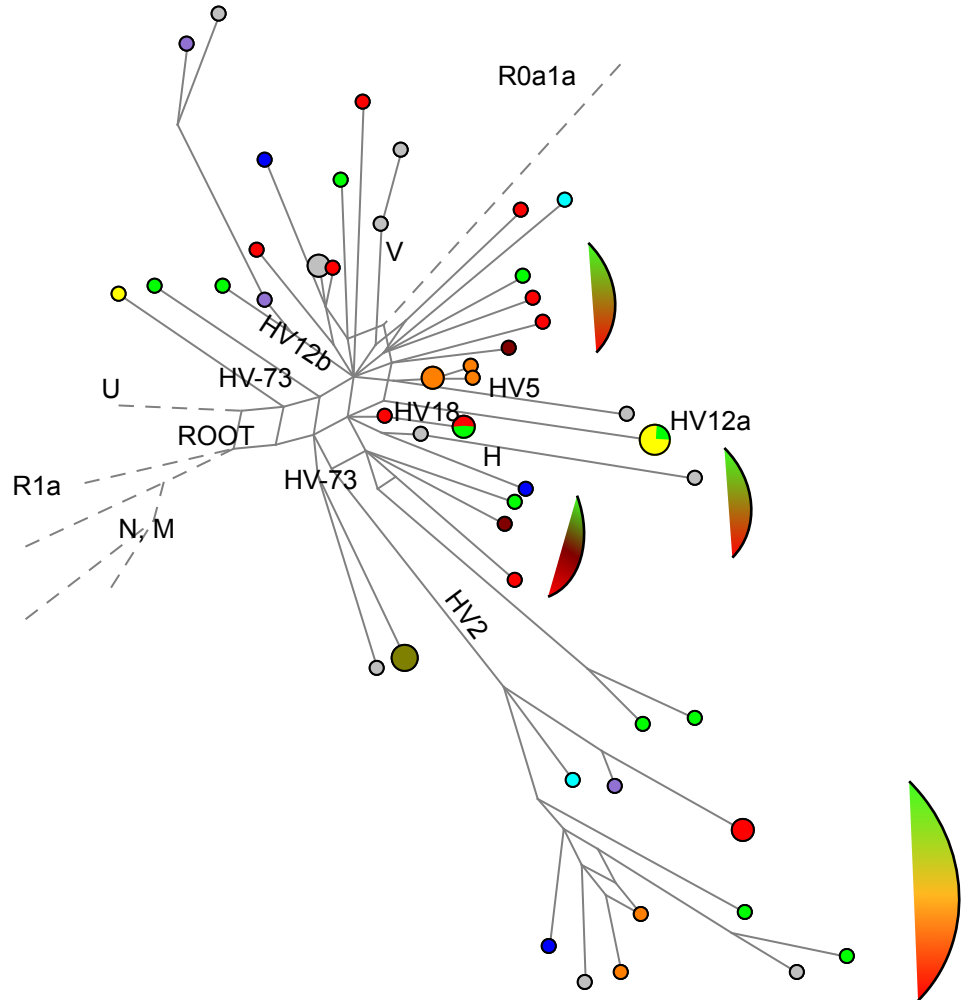

**LEGEND:**

- |                                                    |                                                          |                                                   |
|----------------------------------------------------|----------------------------------------------------------|---------------------------------------------------|
| <span style="color: red;">■</span> South Italy     | <span style="color: olive;">■</span> Africa              | <span style="color: yellow;">■</span> Middle East |
| <span style="color: cyan;">■</span> North Italy    | <span style="color: blue;">■</span> North/Western Europe | <span style="color: green;">■</span> Caucasus     |
| <span style="color: pink;">■</span> Italy "Others" | <span style="color: darkred;">■</span> South Europe      | <span style="color: orange;">■</span> East Europe |
|                                                    |                                                          | <span style="color: purple;">■</span> India       |
|                                                    |                                                          | <span style="color: grey;">■</span> No Info       |
