# Supplementary material for: Fine Dissection of Human Mitochondrial DNA Haplogroup HV Lineages Reveals Paleolithic Signatures from European Glacial Refugia
Source: PubMed Central journal article supplement (PMC4671665; doi:10.1371/journal.pone.0144391), 2015-12-07

**S11 Fig. Median-joining networks for major lineage blocks: haplogroup HV-73, HV5, HV12, HV13, HV18 and HV\*.**

Mutations weighted proportionally to their frequency in the phylogeny.

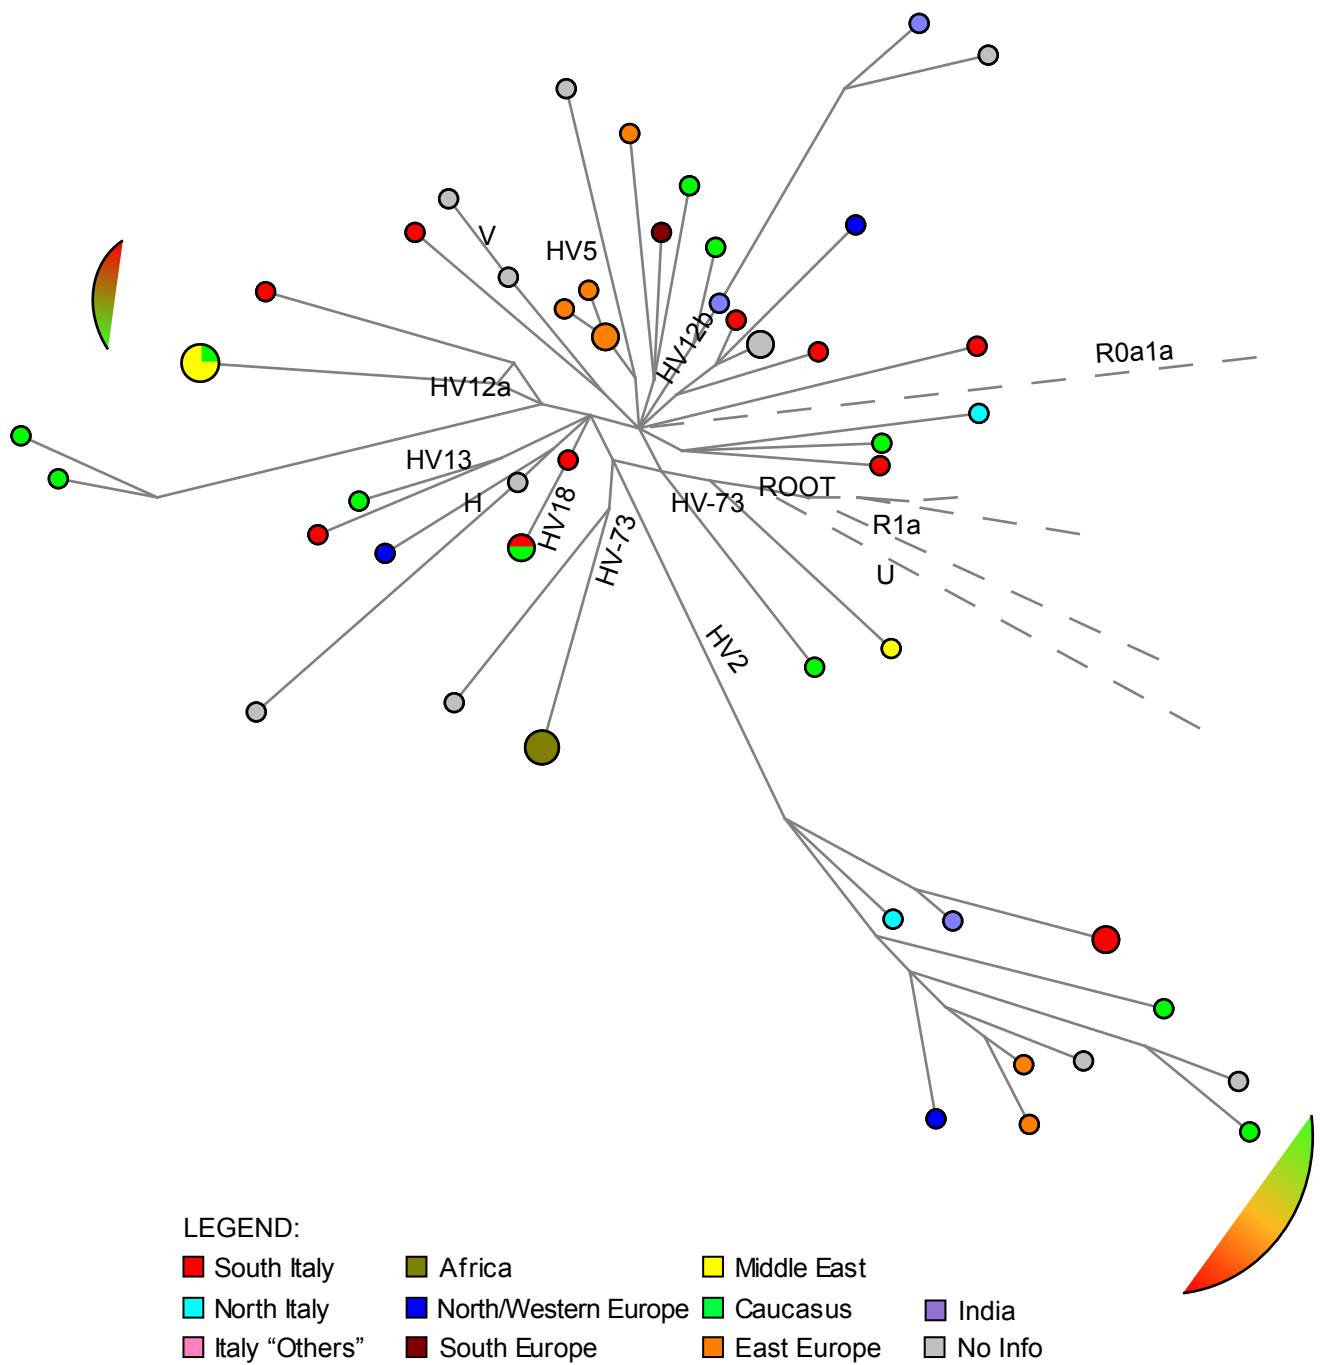

Supplement: pone.0144391.s011.pdf [file pone.0144391.s011.pdf]
