# Supplementary material for: Fine Dissection of Human Mitochondrial DNA Haplogroup HV Lineages Reveals Paleolithic Signatures from European Glacial Refugia
Source: PubMed Central journal article supplement (PMC4671665; doi:10.1371/journal.pone.0144391), 2015-12-07

**S13 Fig. Median-joining networks for major lineage blocks: haplogroups within the 16311 block, including HV-16311\* and HV\*.**

Colored by haplogroup affiliation. Mutations weighted proportionally to their frequency in the phylogeny.

Legend Haplogroups:

- HV\*
- HV-16311\*
- H
- HV6
- HV7
- HV8
- HV9
- HV10
- HV11
- HV14
- HV15
- HV16
- HV17
- V

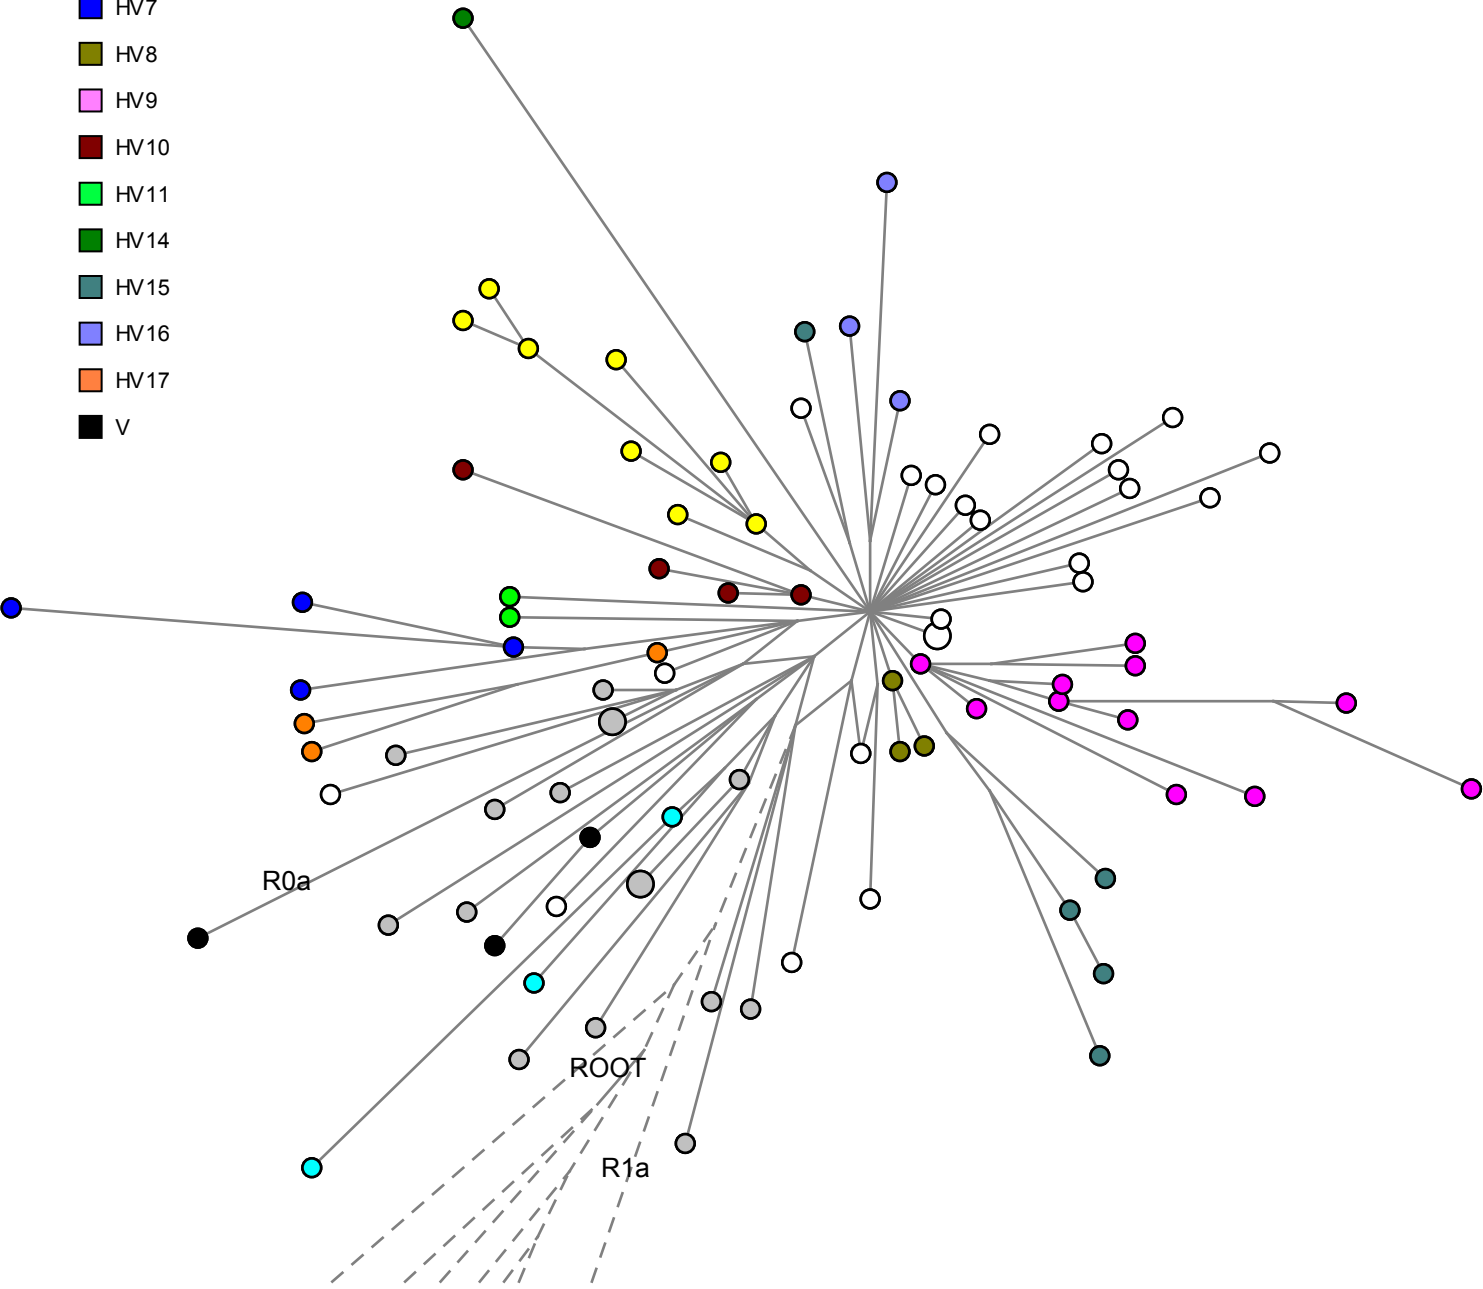

Supplement: pone.0144391.s013.pdf [file pone.0144391.s013.pdf]
