# Supplementary material for: Fine Dissection of Human Mitochondrial DNA Haplogroup HV Lineages Reveals Paleolithic Signatures from European Glacial Refugia
Source: PubMed Central journal article supplement (PMC4671665; doi:10.1371/journal.pone.0144391), 2015-12-07
Supplement: pone.0144391.s014.pdf [file pone.0144391.s014.pdf]

**S14 Fig. Median-joining networks for major lineage blocks: haplogroups within the 16311 block, including HV-16311\* and HV\*.**  
 Colored by geographic origin of the samples. Mutations are given equal weights.

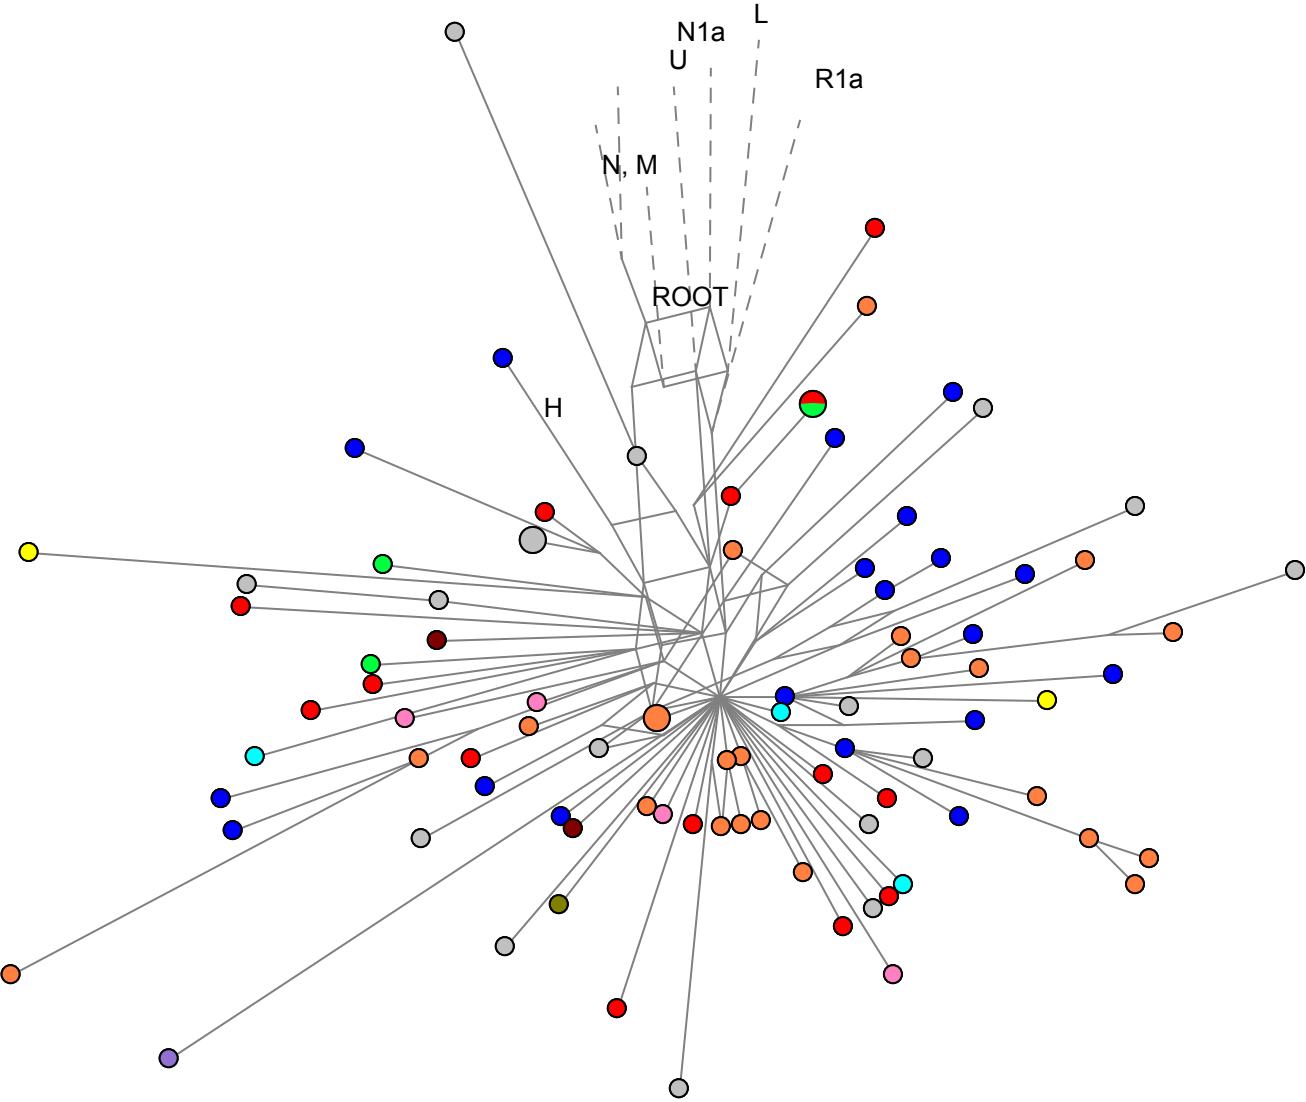

- LEGEND:
- |                  |                        |               |
|------------------|------------------------|---------------|
| ■ South Italy    | ■ Africa               | ■ Middle East |
| ■ North Italy    | ■ North/Western Europe | ■ Caucasus    |
| ■ Italy "Others" | ■ South Europe         | ■ East Europe |
|                  |                        | ■ India       |
|                  |                        | ■ No Info     |
