# Supplementary material for: Fine Dissection of Human Mitochondrial DNA Haplogroup HV Lineages Reveals Paleolithic Signatures from European Glacial Refugia
Source: PubMed Central journal article supplement (PMC4671665; doi:10.1371/journal.pone.0144391), 2015-12-07

**S15 Fig. Bayesian Skyline Plots for the whole HV sequences and for major lineages within HV.** X axis: time in years ago. Y axis: effective population size per generation time. The run for the whole haplogroup HV\*(xH, V) is performed with the with and without a partition in coding and non-coding and a relaxed clock, the other runs for single lineages are performed with a strict clock and no partition (see Methods for details).

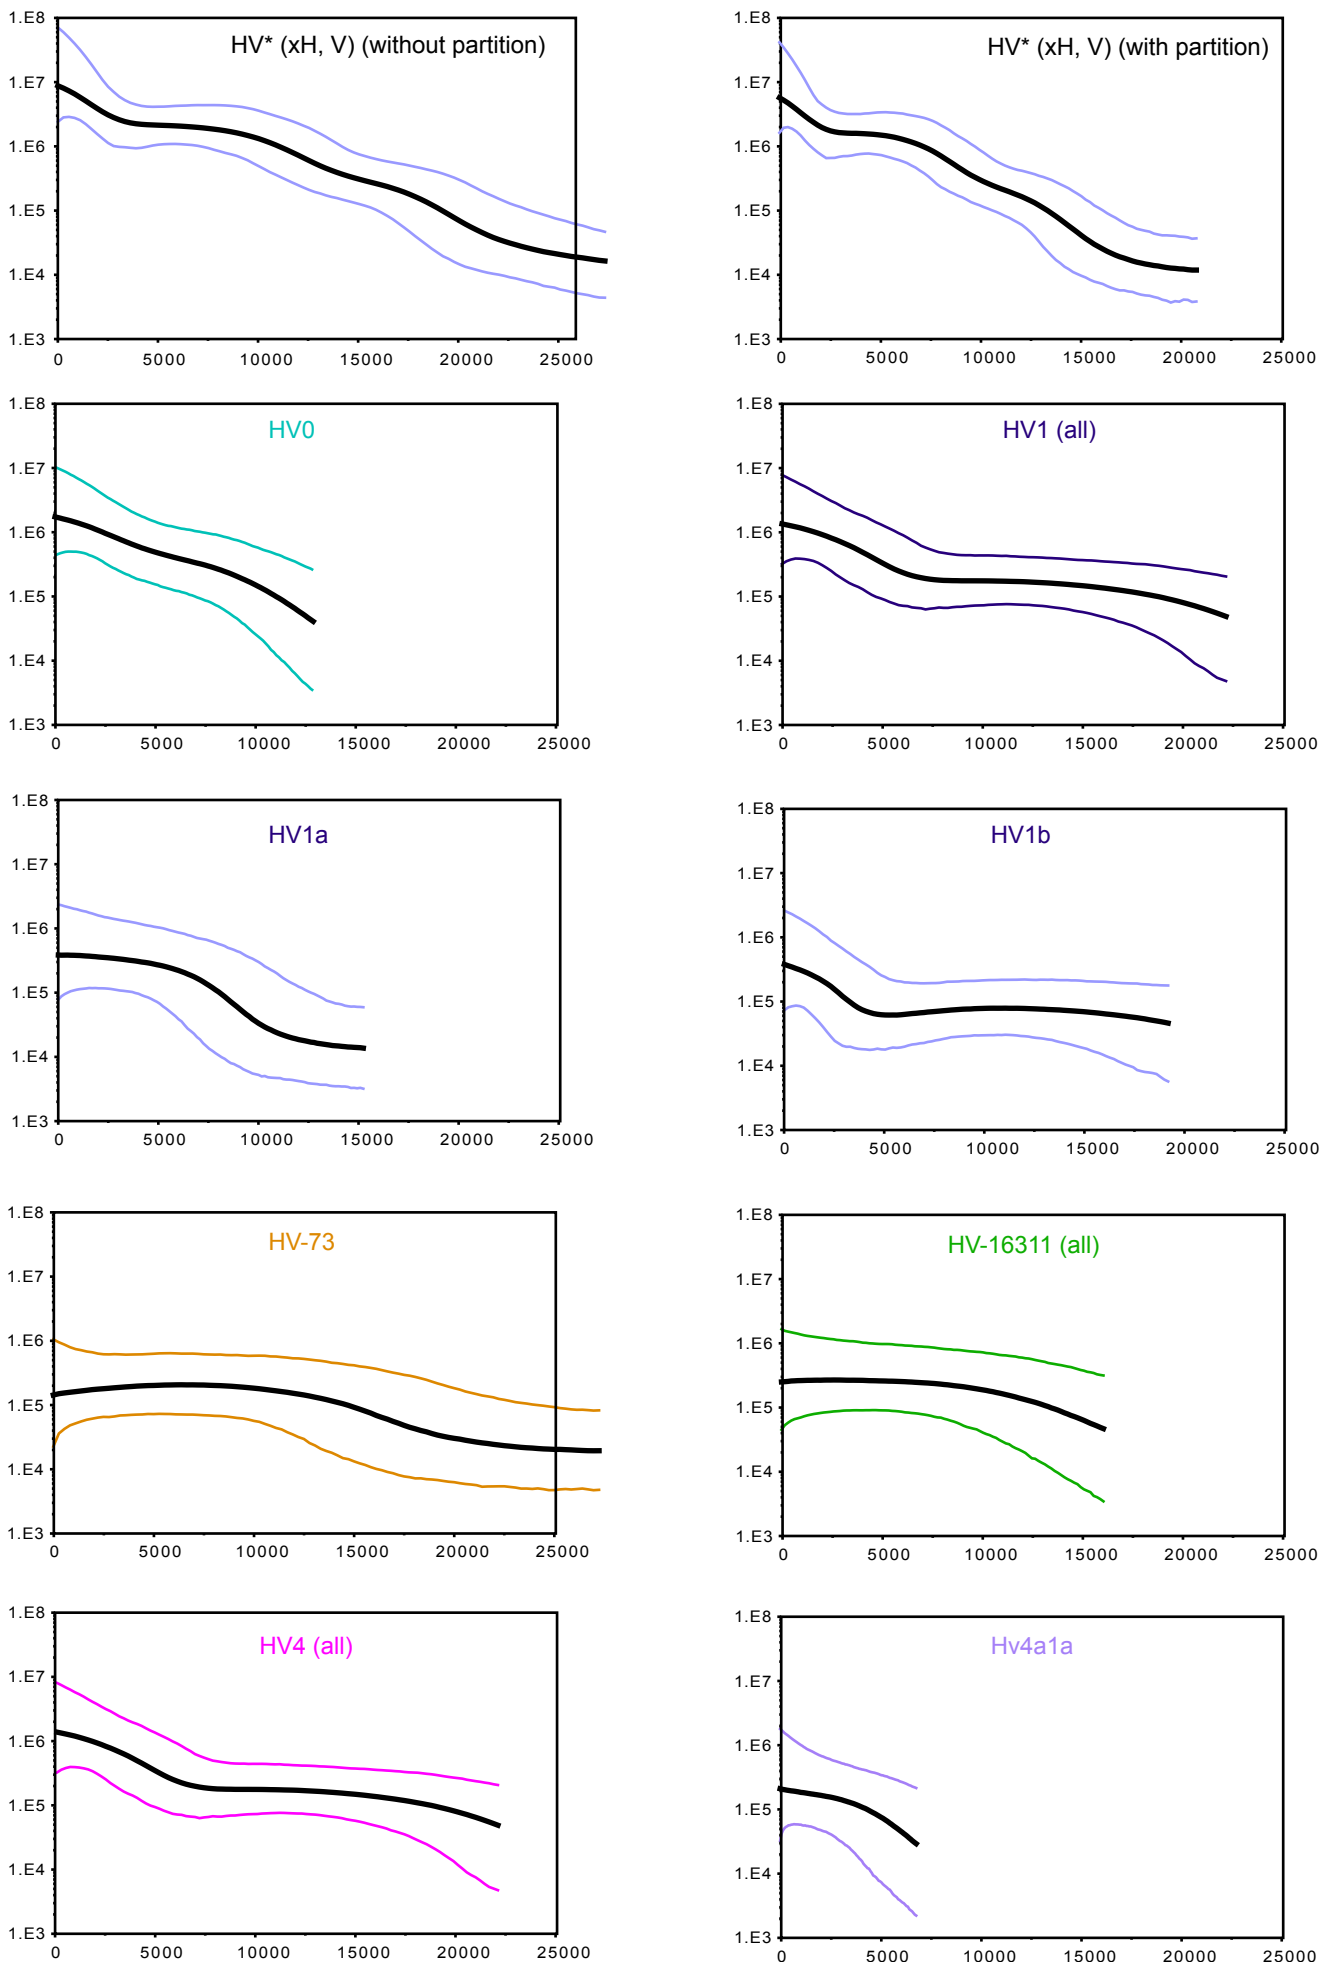

Supplement: pone.0144391.s015.pdf [file pone.0144391.s015.pdf]
