# Supplementary material for: Fine Dissection of Human Mitochondrial DNA Haplogroup HV Lineages Reveals Paleolithic Signatures from European Glacial Refugia
Source: PLoS One. 2015 Dec 7;10(12):e0144391. doi: 10.1371/journal.pone.0144391 (PMC4671665; doi:10.1371/journal.pone.0144391)
Supplement: S1 Table — (XLS) [file pone.0144391.s016.xls]

## Sheet: Table_S1
S1 Table. List of samples considered in the study with relative information.
ID	Haplogroup	HGRED	Country	Population/Region/Town Specification	Group	Reference	Haplofind_assignment	ScoreHaplofind	comments - GenBank accession	Applied manual correction on haplogroup call
AY738941	HV4c	HV4	Italy		ItalyOthers	Achilli et al. 2004	HV4c	1
AY738942	HV1b	HV1	Israel		MiddleEast	Achilli et al. 2004	HV1b	1
AY738943	HV1	HV1	Italy		ItalyOthers	Achilli et al. 2004	HV1a'b'c	1		YES
AY738944	HV0-195	HV0	Italy		ItalyOthers	Achilli et al. 2004	HV0	1
AY738945	HV0a	HV0	Italy		ItalyOthers	Achilli et al. 2004	HV0a	1
rCRS	H2a2a	H	reference		other	Andrews et al. 1999	H2a2a1	1
ZAM063	L0a2a2a	other	Zambia		other	Barbieri et al. 2014	L0a2a2a	1
RSRS	ancestral	ancestral	reference		other	Behar et al. 2012	UNK	0
EF556168	HV1a1a	HV1	Georgia		Caucasus	Behar et al. 2008	HV1a1a	1
EF556182	HV1b1	HV1	Yemen		MiddleEast	Behar et al. 2008	HV1b1	1
EF556190	HV1c	HV1	Morocco		Africa	Behar et al. 2008	HV1c	1
EF556192	HV0b	HV0	Portugal		SouthEurope	Behar et al. 2008	HV0b	1
JQ701908	HV7	HV_16311	England		NorthWestEurope	Behar et al. 2012	HV7	1
JQ701930	HV0a1a	HV0	NA		NoInfo	Behar et al. 2012	HV0a1a	1
JQ701988	HV-16311	HV_16311	NA		NoInfo	Behar et al. 2012	HV9c	0.4		YES - 16311
JQ702013	HV0-195	HV0	NA		NoInfo	Behar et al. 2012	HV0	0.5
JQ702048	HV11	HV_16311	Italy		ItalyOthers	Behar et al. 2012	HV11	1
JQ702116	HV0d	HV0	NA		NoInfo	Behar et al. 2012	HV0d	1
JQ702149	HV0a1a	HV0	NA		NoInfo	Behar et al. 2012	HV0a1a	1
JQ702194	HV0d	HV0	NA		NoInfo	Behar et al. 2012	HV0d	1
JQ702222	HV0d	HV0	NA		NoInfo	Behar et al. 2012	HV0d	1
JQ702299	HV-16311	HV_16311	NA		NoInfo	Behar et al. 2012	HV0f	0.7		YES - 16311
JQ702444	HV-16311	HV_16311	NA		NoInfo	Behar et al. 2012	HV0f	0.7		YES - 16311
JQ702490	HV7	HV_16311	Germany		NorthWestEurope	Behar et al. 2012	HV7	1
JQ702526	HV0d	HV0	NA		NoInfo	Behar et al. 2012	HV0d	1
JQ702536	HV16	HV_16311	Germany		NorthWestEurope	Behar et al. 2012	HV16	1
JQ702596	HV17	HV_16311	NA		NoInfo	Behar et al. 2012	HV17	1
JQ702619	HV0a1a	HV0	NA		NoInfo	Behar et al. 2012	HV0a1a	1
JQ702699	HV0e	HV0	NA		NoInfo	Behar et al. 2012	HV0e	1
JQ702778	HV15	HV_16311	NA		NoInfo	Behar et al. 2012	HV15	1
JQ703059	HV0-195	HV0	NA		NoInfo	Behar et al. 2012	HV0f	0.7		YES
JQ703090	HV1b2	HV1	Ukraine		EasternEurope	Behar et al. 2012	HV1b2	1
JQ703180	HV6	HV_16311	Scotland		NorthWestEurope	Behar et al. 2012	HV6	1
JQ703202	HV9	HV_16311	Unknown		NoInfo	Behar et al. 2012	HV9	1
JQ703250	HV1b2	HV1	Lithuania	Ashkenazi	EasternEurope	Behar et al. 2012	HV1b2	1
JQ703367	HV9	HV_16311	Sweden		NorthWestEurope	Behar et al. 2012	HV9	1
JQ703370	HV-16311	HV_16311	NA		NoInfo	Behar et al. 2012	HV	1		YES - 16311
JQ703415	HV1b2	HV1	Lithuania	Ashkenazi	EasternEurope	Behar et al. 2012	HV1b2	1
JQ703475	HV1b2	HV1	Russian		EasternEurope	Behar et al. 2012	HV1b2	1
JQ703981	HV0f	HV0	NA		NoInfo	Behar et al. 2012	HV0f	1
JQ704124	HV16	HV_16311	Germany		NorthWestEurope	Behar et al. 2012	HV16	1
JQ704142	HV0-195	HV0	NA		NoInfo	Behar et al. 2012	HV0	1
JQ704143	HV0c	HV0	NA		NoInfo	Behar et al. 2012	HV0c	1
JQ704184	HV15	HV_16311	UK		NorthWestEurope	Behar et al. 2012	HV15	1
JQ704188	HV0a	HV0	NA		NoInfo	Behar et al. 2012	HV0a	1
JQ704217	HV10	HV_16311	Poland		EasternEurope	Behar et al. 2012	HV10	1
JQ704284	HV1b3	HV1	NA		NoInfo	Behar et al. 2012	HV1b3	1
JQ704305	HV0-195	HV0	NA		NoInfo	Behar et al. 2012	HV0	1
JQ704349	HV4a2b	HV4	Italy		ItalyOthers	Behar et al. 2012	HV4a2b	1
JQ704445	HV4a1	HV4	France		NorthWestEurope	Behar et al. 2012	HV4a1	1
JQ704463	HV2a	HV-73	Unknown		NoInfo	Behar et al. 2012	HV2a	1
JQ704610	HV0d	HV0	NA		NoInfo	Behar et al. 2012	HV0d	1
JQ704799	HV9b	HV_16311	Ireland		NorthWestEurope	Behar et al. 2012	HV9b	1
JQ704923	HV0-195	HV0	NA		NoInfo	Behar et al. 2012	HV0	0.5
JQ704966	HV-16311	HV_16311	NA		NoInfo	Behar et al. 2012	HV	1		YES - 16311
JQ705004	HV1b2	HV1	Poland		EasternEurope	Behar et al. 2012	HV1b2	1
JQ705008	HV0-195	HV0	NA		NoInfo	Behar et al. 2012	HV0	1
JQ705127	HV0f	HV0	NA		NoInfo	Behar et al. 2012	HV0f	1
JQ705234	HV2a	HV-73	NA		NoInfo	Behar et al. 2012	HV2a	0.9
JQ705261	HV0f	HV0	NA		NoInfo	Behar et al. 2012	HV0f	0.7	should be into 16311, even if it has T72C typical of Hv0	YES - 16311
JQ705344	HV4a1	HV4	Italy		ItalyOthers	Behar et al. 2012	HV4a1	1
JQ705368	HV9a	HV_16311	Germany		NorthWestEurope	Behar et al. 2012	HV9a	1
JQ705416	HV17	HV_16311	Ireland		NorthWestEurope	Behar et al. 2012	HV17	1
JQ705526	HV1c	HV1	Unknown		NoInfo	Behar et al. 2012	HV1c	1
JQ705540	HV1b2	HV1	Romania	Jew	EasternEurope	Behar et al. 2012	HV1b2	1
JQ705544	HV0*	HV0	NA		NoInfo	Behar et al. 2012	HV0	1
JQ705565	HV0*	HV0	NA		NoInfo	Behar et al. 2012	HV0	1
JQ705567	HV0a1	HV0	NA		NoInfo	Behar et al. 2012	HV0a1	1
JQ705599	HV0*	HV0	NA		NoInfo	Behar et al. 2012	HV0	1
JQ705953	H	H	NA		NoInfo	Behar et al. 2012	H	1
JQ705963	HV0e	HV0	NA		NoInfo	Behar et al. 2012	HV0e	1
JQ705967	HV0e	HV0	NA		NoInfo	Behar et al. 2012	HV0e	1
JQ706016	HV0-195	HV0	NA		NoInfo	Behar et al. 2012	HV0	1
JX297154	HV4a1a	HV4	Spain		SouthEurope	Cardoso et al 2013	HV4a1a	1
HM185216	R0a1a	other	Yemen		MiddleEast	Cerny et al. 2011	R0a1a	1
FJ460528	HV-16311	HV_16311	Tunisia		Africa	Costa et al. 2009	HV	1	from new Phylotree, could be HV23	YES - 16311
FJ460546	HV0-195	HV0	Tunisia		Africa	Costa et al. 2009	HV0	1
FJ460547	HV1a1a	HV1	Tunisia		Africa	Costa et al. 2009	HV1a1a	1
KF729951	HV*	HV	Bulgaria		EasternEurope	FamilyTreeDNA	HV9a	0.5
DQ377992	HV5	HV_others	Belarussia		EasternEurope	FamilyTreeDNA	HV5	1
DQ856316	HV1b2	HV1	Unknown		NoInfo	FamilyTreeDNA	HV1b2	1
EF396958	HV1b2	HV1	Lithuania		EasternEurope	FamilyTreeDNA	HV1b2	1
EF417833	HV4	HV4	Unknown		NoInfo	FamilyTreeDNA	HV4	1
EF419890	HV5	HV_others	Latvia		EasternEurope	FamilyTreeDNA	HV5	1
EF421157	HV1b2	HV1	Lithuania		EasternEurope	FamilyTreeDNA	HV1b2	1
EF471977	HV0c	HV0	England		NorthWestEurope	FamilyTreeDNA	HV0c	1
EF649971	HV0a1a	HV0	Unknown		NoInfo	FamilyTreeDNA	HV0a1a	1
EU558385	HV5	HV_others	Poland		EasternEurope	FamilyTreeDNA	HV5	1
FJ210876	HV1b2	HV1	Lithuania		EasternEurope	FamilyTreeDNA	HV1b2	1
FJ210914	HV1a1b	HV1	Turkey		MiddleEast	FamilyTreeDNA	HV1a1b	1
FJ430150	HV9a1	HV_16311	Australia		other	FamilyTreeDNA	HV9a1	1
GQ228844	HV-16311	HV_16311	Poland		EasternEurope	FamilyTreeDNA	HV	1		YES - 16311
HM008695	HV10	HV_16311	Hungary		EasternEurope	FamilyTreeDNA	HV10	1
HM228422	HV4a2a	HV4	ND	Assyrian	MiddleEast	FamilyTreeDNA	HV4a2a	1
HM352798	HV-16311	HV_16311	Hungary		EasternEurope	FamilyTreeDNA	HV	1		YES - 16311
HM370047	HV-16311	HV_16311	Germany		NorthWestEurope	FamilyTreeDNA	HV	1		YES - 16311
HM998901	HV1b3	HV1	Armenian		Caucasus	FamilyTreeDNA	HV1b3	1
HQ015160	HV2a	HV-73	Armenian		Caucasus	FamilyTreeDNA	HV2a	0.9
HQ112361	HV8	HV_16311	Russia		EasternEurope	FamilyTreeDNA	HV8	1
HQ165756	HV1b	HV1	Armenian		Caucasus	FamilyTreeDNA	HV1b	1
HQ287727	HV*	HV	Armenian		Caucasus	FamilyTreeDNA	HV9c	0.4		YES
HQ326986	HV1a1b	HV1	Syria		MiddleEast	FamilyTreeDNA	HV1a1b	1
HQ412622	HV1b3	HV1	Armenian		Caucasus	FamilyTreeDNA	HV1b3	1
HQ436102	HV-73	HV-73	Armenian		Caucasus	FamilyTreeDNA	HV9c	0.4		YES
HQ658354	HV16	HV_16311	Scotland		NorthWestEurope	FamilyTreeDNA	HV16	1
HQ658738	HV6	HV_16311	England		NorthWestEurope	FamilyTreeDNA	HV6	1
HQ660704	HV-16311	HV_16311	Norway		NorthWestEurope	FamilyTreeDNA	HV	1		YES - 16311
HQ844516	HV12a	HV_others	Armenian		Caucasus	FamilyTreeDNA	HV12a1	1
JF316743	HV1a2	HV1	Armenian		Caucasus	FamilyTreeDNA	HV1a2	1
JF320654	HV1	HV1	Armenian		Caucasus	FamilyTreeDNA	HV1	1
JF700125	HV13	HV_others	Armenian		Caucasus	FamilyTreeDNA	HV13	1
JN034636	HV5	HV_others	Poland		EasternEurope	FamilyTreeDNA	HV5	1
JN053060	HV12a	HV_others	Armenian		Caucasus	FamilyTreeDNA	HV12a1	1
JN794568	HV0d	HV0	England		NorthWestEurope	FamilyTreeDNA	HV0d	1
JQ002593	HV1a1a	HV1	Armenian		Caucasus	FamilyTreeDNA	HV1a1a	1
JQ272477	HV4c	HV4	Italy		ItalyOthers	FamilyTreeDNA	HV4c	1
JX025553	HV1b2	HV1	Belarussia		EasternEurope	FamilyTreeDNA	HV1b2	1
KC985149	R1a	other	Yakut		Asia	Fedorova et al 2013	R1a	1
GU592033	HV*	HV	NA		NoInfo	Fendt et al 2011	HV9c	0.4		YES
GU592048	HV*	HV	NA		NoInfo	Fendt et al 2011	HV9c	0.4		YES
DQ523620	HV0a	HV0	NA		NoInfo	Fraumene et al. 2006	HV0a	1
GQ888728	HV4a1a2	HV4	Spain		SouthEurope	Garcia et al. 2011	HV4a1a2	0.5
GQ888729	HV4a1a	HV4	Spain		SouthEurope	Garcia et al. 2011	HV4a1a	1
GQ888730	HV4a1a3	HV4	Spain		SouthEurope	Garcia et al. 2011	HV4a1a3	1
GQ888731	HV4a2a	HV4	Jordania		MiddleEast	Garcia et al. 2011	HV4a2a	1
EF660924	HV0-195	HV0	Italy		ItalyOthers	Gasparre et al. 2007	HV0	1
EF660935	HV1a2	HV1	Italy		ItalyOthers	Gasparre et al. 2007	HV1a2	1
EF660936	HV1a'b'c	HV1	Italy		ItalyOthers	Gasparre et al. 2007	HV1a'b'c	1
EF660939	HV4a1	HV4	Italy		ItalyOthers	Gasparre et al. 2007	HV4a1	1
EF660945	HV-16311	HV_16311	Italy		ItalyOthers	Gasparre et al. 2007	HV	1	from new Phylotree, could be HV22	YES - 16311
EF660954	HV11a	HV_16311	Italy		ItalyOthers	Gasparre et al. 2007	HV11a	1
EF660958	HV-16311	HV_16311	Italy		ItalyOthers	Gasparre et al. 2007	HV	1		YES - 16311
EF660968	HV0f	HV0	Italy		ItalyOthers	Gasparre et al. 2007	HV0f	1
EF660977	HV0b	HV0	Italy		ItalyOthers	Gasparre et al. 2007	HV0b	1
1287072	HV15	HV_16311	Finland		NorthWestEurope	Raule et al. 2014	HV15	1	JX152993
1290692	HV0a1	HV0	Finland		NorthWestEurope	Raule et al. 2014	HV0a1	1	JX152996
1373703	HV1a2	HV1	Greece		SouthEurope	Raule et al. 2014	HV1a2	1	JX153051
1380306	HV-16311	HV_16311	Greece		SouthEurope	Raule et al. 2014	HV	1	JX153057	YES - 16311
1385150	HV*	HV	Greece		SouthEurope	Raule et al. 2014	H94	0.5	JX153061	YES
1573419	HV*	HV	Italy	CALABRIA	SouthItaly	Raule et al. 2014	HV9c	0.4	JX153087	YES
1895890	HV0a1	HV0	Denmark		NorthWestEurope	Raule et al. 2014	HV0a1	1	JX153134
2093511	HV0*	HV0	Italy	CALABRIA	SouthItaly	Raule et al. 2014	HV0	1	JX153274
2434019	HV2a	HV-73	Denmark		NorthWestEurope	Raule et al. 2014	HV2a	0.9	JX153323
2480654	H	H	Denmark		NorthWestEurope	Raule et al. 2014	HV0f	0.7	JX153371	YES
2505733	HV0-195	HV0	Denmark		NorthWestEurope	Raule et al. 2014	HV0	1	JX153420
2513748	HV*	HV	Denmark		NorthWestEurope	Raule et al. 2014	HV9a	0.5	JX153435	YES
2519354	HV9	HV_16311	Denmark		NorthWestEurope	Raule et al. 2014	HV9	1	JX153443
2920724	HV13	HV_others	Italy	CALABRIA	SouthItaly	Raule et al. 2014	HV13	1	JX153457
3199869	HV15	HV_16311	Finland		NorthWestEurope	Raule et al. 2014	HV15	1	JX153576
JN214392	HV4a1a1	HV4	Spain		SouthEurope	Gomez-Carballa et al. 2012	HV4a1a1	1
JN214394	HV4a1a	HV4	Spain		SouthEurope	Gomez-Carballa et al. 2012	HV4a1a	1
JN214395	HV4a1a	HV4	Spain		SouthEurope	Gomez-Carballa et al. 2012	HV4a1a	1
JN214396	HV4a1a	HV4	Spain		SouthEurope	Gomez-Carballa et al. 2012	HV4a1a	1
JN214397	HV4a1a2	HV4	Spain		SouthEurope	Gomez-Carballa et al. 2012	HV4a1a2	1
JN214398	HV4a1a2	HV4	Spain		SouthEurope	Gomez-Carballa et al. 2012	HV4a1a2	1
JN214399	HV4a1a2	HV4	Spain		SouthEurope	Gomez-Carballa et al. 2012	HV4a1a2	1
JN214400	HV4a1a2	HV4	Spain		SouthEurope	Gomez-Carballa et al. 2012	HV4a1a2	1
JN214401	HV4a1a2	HV4	Canada		other	Gomez-Carballa et al. 2012	HV4a1a2	1
JN214403	HV4a1a2	HV4	Spain		SouthEurope	Gomez-Carballa et al. 2012	HV4a1a2	1
JN214404	HV4a1a2	HV4	Spain		SouthEurope	Gomez-Carballa et al. 2012	HV4a1a2	1
JN214405	HV4a1a	HV4	France		NorthWestEurope	Gomez-Carballa et al. 2012	HV4a1a	1
JN214406	HV4a1a	HV4	Spain		SouthEurope	Gomez-Carballa et al. 2012	HV4a1a	1
JN214407	HV4a1a	HV4	Spain		SouthEurope	Gomez-Carballa et al. 2012	HV4a1a	1
JN214408	HV4a1a	HV4	Spain		SouthEurope	Gomez-Carballa et al. 2012	HV4a1a	1
JN214409	HV4a1a	HV4	Spain		SouthEurope	Gomez-Carballa et al. 2012	HV4a1a	1
JN214410	HV4a1a4	HV4	France		NorthWestEurope	Gomez-Carballa et al. 2012	HV4a1a4	1
JN214412	HV4a1a4	HV4	France		NorthWestEurope	Gomez-Carballa et al. 2012	HV4a1a4	1
JN214413	HV4a1a4	HV4	France		NorthWestEurope	Gomez-Carballa et al. 2012	HV4a1a4	1
JN214414	HV4a1a4	HV4	Canada		other	Gomez-Carballa et al. 2012	HV4a1a4	1
JN214415	HV4a1a4	HV4	Canada		other	Gomez-Carballa et al. 2012	HV4a1a4	1
JN214416	HV4a1a4	HV4	Canada		other	Gomez-Carballa et al. 2012	HV4a1a4	1
JN214417	HV4a1a4	HV4	USA		other	Gomez-Carballa et al. 2012	HV4a1a4	1
JN214418	HV4a1a4	HV4	Italy		ItalyOthers	Gomez-Carballa et al. 2012	HV4a1a4	1
JN214419	HV4a1a4	HV4	Italy		ItalyOthers	Gomez-Carballa et al. 2012	HV4a1a4	1
JN214420	HV4a1a4	HV4	Italy		ItalyOthers	Gomez-Carballa et al. 2012	HV4a1a4	1
JN214421	HV4a1a	HV4	Ireland		NorthWestEurope	Gomez-Carballa et al. 2012	HV4a1a	1
JN214422	HV4a1a	HV4	Denmark		NorthWestEurope	Gomez-Carballa et al. 2012	HV4a1a	1
JN214423	HV4a1a	HV4	Canada		other	Gomez-Carballa et al. 2012	HV4a1a	1
JN214424	HV4a1a	HV4	Ireland		NorthWestEurope	Gomez-Carballa et al. 2012	HV4a1a	1
JN214425	HV4a1a	HV4	England		NorthWestEurope	Gomez-Carballa et al. 2012	HV4a1a	1
JN214426	HV4a1a	HV4	Scotland		NorthWestEurope	Gomez-Carballa et al. 2012	HV4a1a	1
JN214427	HV4a1a	HV4	Bulgaria		EasternEurope	Gomez-Carballa et al. 2012	HV4a1a	0.6
JN214428	HV4a1	HV4	France		NorthWestEurope	Gomez-Carballa et al. 2012	HV4a1	1
JN214429	HV4a2b	HV4	Italy		ItalyOthers	Gomez-Carballa et al. 2012	HV4a2b	1
AF346978	HV0-195	HV0	England		NorthWestEurope	Ingman et al. 2000	HV0	1
AP012423	N21	other	Malesia	Temuan	other	Jinam et al. 2012	N21a	1
HM625688	HV-16311	HV_16311	NA		NoInfo	Kloss-Brandstätter et al. 2010	HV	1		YES - 16311
HM030528	N11b	other	Oroqen_EastAsia		other	Kong et al. 2011	N11a	1
EU935433	HV-73	HV-73	Egypt		Africa	Kujanova et al. 2009	HV9c	0.4	from new Phylotree, could be HV20	YES
EU935436	HV-73	HV-73	Egypt		Africa	Kujanova et al. 2009	HV9c	0.4	from new Phylotree, could be HV20	YES
EU935445	HV-73	HV-73	Egypt		Africa	Kujanova et al. 2009	HV9c	0.4	from new Phylotree, could be HV20	YES
EU935457	HV4a2b	HV4	Egypt		Africa	Kujanova et al. 2009	HV4a2b	1
EU935461	HV1a2a	HV1	Egypt		Africa	Kujanova et al. 2009	HV1a2a	1
AF381997	HV-73	HV-73	Jordania		MiddleEast	Maca-Meyer et al. 2001	HV	1		YES
EF222232	HV6	HV_16311	Unknown		NoInfo	Malyarchuk et al. 2008	HV6	1
EF222233	HV9	HV_16311	Russia		EasternEurope	Malyarchuk et al. 2008	HV9b	1
EF222234	HV4b	HV4	Russia		EasternEurope	Malyarchuk et al. 2008	HV4b	1
EF222245	HV10	HV_16311	Poland		EasternEurope	Malyarchuk et al. 2008	HV10	1
EF222246	HV8	HV_16311	Russia		EasternEurope	Malyarchuk et al. 2008	HV8	1
EF222247	HV9a1	HV_16311	Russia		EasternEurope	Malyarchuk et al. 2008	HV9a1	1
EF222251	HV-16311	HV_16311	Poland		EasternEurope	Malyarchuk et al. 2008	HV	1		YES - 16311
EF222253	HV9a	HV_16311	Russia		EasternEurope	Malyarchuk et al. 2008	HV9a	0.5	correct HV9	YES
EU545420	HV10	HV_16311	CzechRepublic		EasternEurope	Malyarchuk et al. 2008	HV10	1		YES
EU545422	HV9a	HV_16311	CzechRepublic		EasternEurope	Malyarchuk et al. 2008	HV9a	1
EU545424	HV17	HV_16311	CzechRepublic		EasternEurope	Malyarchuk et al. 2008	HV17	1
EU545435	HV-16311	HV_16311	Russia		EasternEurope	Malyarchuk et al. 2008	HV	1		YES - 16311
EU545436	HV6a	HV_16311	Russia		EasternEurope	Malyarchuk et al. 2008	HV6a	1
EU545439	HV6a	HV_16311	Russia		EasternEurope	Malyarchuk et al. 2008	HV6a	1
EU545441	HV7	HV_16311	Russia		EasternEurope	Malyarchuk et al. 2008	HV7	1
EU545443	HV7	HV_16311	Russia		EasternEurope	Malyarchuk et al. 2008	HV7	1
EU545447	HV4	HV4	Russia		EasternEurope	Malyarchuk et al. 2008	HV4	1
EU545452	HV6	HV_16311	Slovakia		EasternEurope	Malyarchuk et al. 2008	HV6	1
EU545454	HV6a	HV_16311	Slovakia		EasternEurope	Malyarchuk et al. 2008	HV6a	1
EU545457	HV8	HV_16311	Slovakia		EasternEurope	Malyarchuk et al. 2008	HV8	1
EU567452	HV2a	HV-73	Slovakia		EasternEurope	Malyarchuk et al. 2009	HV2a	1
EU567456	HV2a	HV-73	Slovakia		EasternEurope	Malyarchuk et al. 2009	HV2a	1
GU122990	HV0a1	HV0	Russia		EasternEurope	Malyarchuk et al. 2010	HV0a1	1
JF260932	HV1d	HV1	Yemen		MiddleEast	Musilova et al. 2011	HV1d	1
JF260933	HV1d	HV1	Yemen		MiddleEast	Musilova et al. 2011	HV1d	1
JF260934	HV1a3	HV1	Yemen		MiddleEast	Musilova et al. 2011	HV1a3	1
JF260935	HV1a3	HV1	Ethiopia		Africa	Musilova et al. 2011	HV1a3	1
JF260936	HV1a3	HV1	Yemen		MiddleEast	Musilova et al. 2011	HV1a3	1
JF260937	HV1a3	HV1	Yemen		MiddleEast	Musilova et al. 2011	HV1a3	1
JF260938	HV1a1a	HV1	Yemen		MiddleEast	Musilova et al. 2011	HV1a1a	1
JF260939	HV1a1a	HV1	Yemen		MiddleEast	Musilova et al. 2011	HV1a1a	1
JF260940	HV1a1a	HV1	Yemen		MiddleEast	Musilova et al. 2011	HV1a1a	1
JF260941	HV1a2a	HV1	Sudan		Africa	Musilova et al. 2011	HV1a2a	1
JF260942	HV1a2a	HV1	Morocco		Africa	Musilova et al. 2011	HV1a2a	1
JF260943	HV1a2	HV1	Tunisia		Africa	Musilova et al. 2011	HV1a2	1
JF260944	HV1b	HV1	Tunisia		Africa	Musilova et al. 2011	HV1b	1
JF260945	HV1b1b	HV1	Somalia		Africa	Musilova et al. 2011	HV1b1b	1
JF260946	HV1b1b	HV1	Yemen		MiddleEast	Musilova et al. 2011	HV1b1b	1
JF260947	HV1b1b	HV1	Somalia		Africa	Musilova et al. 2011	HV1b1b	1
JF260948	HV1b1b	HV1	Yemen		MiddleEast	Musilova et al. 2011	HV1b1b	1
JF260949	HV1b1a	HV1	Yemen		MiddleEast	Musilova et al. 2011	HV1b1a	1
JF260950	HV1b1a	HV1	Yemen		MiddleEast	Musilova et al. 2011	HV1b1a	1
JF260951	HV1b1a	HV1	Somalia		Africa	Musilova et al. 2011	HV1b1a	1
EF060330	M1a1	other	Greece		SouthEurope	Olivieri et al. 2006	M1a1	1
GU290215	N1a1a1a1	other	Russia		EasternEurope	Palanicham et al. 2010	N1a1a1a1	1
AY713976	HV12b	HV_others	India		Asia	Palanichamy et al. 2004	HV12b	1
AY713986	HV2	HV-73	India		Asia	Palanichamy et al. 2004	HV2	1
AY713987	HV12b	HV_others	India		Asia	Palanichamy et al. 2004	HV12b1a	1
AY713988	HV14	HV_16311	India		Asia	Palanichamy et al. 2004	HV14	1
AY495311	V	other	NA		NoInfo	FamilyTreeDNA	V	1
HQ711364	V	other	NA		NoInfo	FamilyTreeDNA	V	1
ag170	HV*	HV	Italy	Agrigento	SouthItaly	present study / Tartu lab	H81	1	KP340169	YES
ag194	HV15	HV_16311	Italy	Agrigento	SouthItaly	present study / Tartu lab	HV15	0.6	KP340177
ass22	HV4a2	HV4	USA(assyrian)	USA(assyrian)	MiddleEast	present study / Tartu lab	HV4a2a	1	KP340178
ass77	HV4a2	HV4	USA(assyrian)	USA(assyrian)	MiddleEast	present study / Tartu lab	HV4a2a	1	KP340179
azerE43	HV4a1	HV4	Iran		MiddleEast	present study / Tartu lab	HV4a1	1	KP340170
cze97	HV4	HV4	CzechRepublic		EasternEurope	present study / Tartu lab	HV4	1	KP340171
dar97	HV4b	HV4	Caucasus	Darginians	Caucasus	present study / Tartu lab	HV4b	1	KP340172
DB1030	HV*	HV	Italy	Catania	SouthItaly	present study	H82	1	KP340126	YES
DB1062	HV-16311	HV_16311	Italy	Catania	SouthItaly	present study	HV	1	KP340127	YES - 16311
DB1089	HV0e	HV0	Italy	Ragusa	SouthItaly	present study	HV0e	1	KP340146
DB1096	HV-16311	HV_16311	Italy	Ragusa	SouthItaly	present study	HV	1	KP340128	YES - 16311
DB1115	HV-16311	HV_16311	Italy	Enna	SouthItaly	present study	HV	1	KP340129	YES - 16311
DB1125	HV0e	HV0	Italy	Enna	SouthItaly	present study	HV0e	1	KP340147
DB1139	HV2	HV-73	Italy	Enna	SouthItaly	present study	HV2	1	KP340158
DB1152	HV2	HV-73	Italy	Enna	SouthItaly	present study	HV2	1	KP340159
DB1163	HV0b	HV0	Italy	Enna	SouthItaly	present study	HV0b	1	KP340144
DB1188	HV*	HV	Italy	Agrigento	SouthItaly	present study	HV	1	KP340130
DB1235	HV1a1	HV1	Italy	Trapani	SouthItaly	present study	HV1a1a	0.5	KP340153
DB1319	HV0e	HV0	Italy	Brescia	NorthItaly	present study	HV0e	1	KP340148
DB1340	HV0a	HV0	Italy	Brescia	NorthItaly	present study	HV0a	1	KP340143
DB1342	HV0-195	HV0	Italy	Brescia	NorthItaly	present study	HV0	1	KP340137	could be also HV0e without a mutation
DB1373	HV-16311	HV_16311	Italy	Como	NorthItaly	present study	HV	1	KP340131	YES - 16311
DB1406	HV2	HV-73	Italy	Como	NorthItaly	present study	HV2	1	KP340160
DB1502	HV*	HV	Italy	Terni	SouthItaly	present study	HV0f	0.7	KP340132	YES
DB1589	HV4a1	HV4	Italy	Savona	NorthItaly	present study	HV4a1	1	KP340167
DB1593	HV0*	HV0	Italy	Savona	NorthItaly	present study	HV0	1	KP340138
DB1594	HV*	HV	Italy	Cuneo	NorthItaly	present study	HV0f	0.7	KP340133	YES
DB1609	HV0d	HV0	Italy	Cuneo	NorthItaly	present study	HV0d	1	KP340145
DB1628	HV0e	HV0	Italy	Cuneo	NorthItaly	present study	HV0e	1	KP340149
DB1631	HV0-195	HV0	Italy	Cuneo	NorthItaly	present study	HV0	1	KP340139
DB17	HV13	HV_others	Italy	Lecce	SouthItaly	present study	HV13	1	KP340152
DB1725	HV0-195	HV0	Italy	Benevento	SouthItaly	present study	HV0	1	KP340140
DB1756	HV0*	HV0	Italy	Pistoia	NorthItaly	present study	HV0	1	KP340141
DB1967	HV*	HV	Italy	Matera	SouthItaly	present study	HV0f	0.7	KP340151	YES
DB2008	HV1a1a	HV1	Italy	Matera	SouthItaly	present study	HV1a1a	1	KP340154
DB2190	HV0e	HV0	Italy	Aviano	NorthItaly	present study	HV0e	1	KP340150
DB2192	HV1a'b'c	HV1	Italy	Aviano	NorthItaly	present study	HV1a'b'c	1	KP340155
DB2209	HV0-195	HV0	Italy	Treviso	NorthItaly	present study	HV0	1	KP340142
DB2259	HV-16311	HV_16311	Italy	Campobasso	SouthItaly	present study	HV	1	KP340134	YES - 16311
DB2266	HV4	HV4	Italy	Campobasso	SouthItaly	present study	HV4	1	KP340161
DB2617	HV-16311	HV_16311	Italy	Bologna	NorthItaly	present study	HV	1	KP340135	YES - 16311
DB28	HV1c	HV1	Italy	Lecce	SouthItaly	present study	HV1c	1	KP340157
DB359	HV4	HV4	Italy	Crotone	SouthItaly	present study	HV4	1	KP340162
DB398	HV-16311	HV_16311	Italy	Cosenza	SouthItaly	present study	HV0	0.6	KP340136	YES - 16311
DB532	HV1a'b'c	HV1	Italy	Vicenza	NorthItaly	present study	HV1a'b'c	1	KP340156
DB742	HV4	HV4	Italy	Macerata	SouthItaly	present study	HV4	1	KP340163
DB743	HV6	HV_16311	Italy	Macerata	SouthItaly	present study	HV6	0.7	KP340168
DB774	HV4	HV4	Italy	Macerata	SouthItaly	present study	HV4b	0.5	KP340164
DON_01	HV4	HV4	Italy	Cosenza	SouthItaly	present study	HV4	1	KP340165
ggz108	HV4c	HV4	Moldova	Gagauzis	SouthEurope	present study / Tartu lab	HV4	1	KP340173
gr21	HV4b	HV4	Greece		SouthEurope	present study / Tartu lab	HV4b	1	KP340180
herz57	HV4a1	HV4	Bosnia-Herzegovina		SouthEurope	present study / Tartu lab	HV4a1	1	KP340174
NONN_01	HV4	HV4	Italy	Cosenza	SouthItaly	present study	HV4	1	KP340166
sic3543	HV*	HV	Italy	Palermo	SouthItaly	present study / Tartu lab	HV9c	0.4	KP340175	YES
sic3551	HV1b	HV1	Italy	Caltanissetta	SouthItaly	present study / Tartu lab	HV1b	1	KP340176
HM852790	U1a1	other	Caucasus	Azeri	Caucasus	Schoenberg et al. 2011	U1a1	1
HM852816	HV*	HV	Caucasus		Caucasus	Schoenberg et al. 2011	HV	1
HM852785	HV12b	HV_others	Armenian		Caucasus	Schoenberg et al. 2011	HV12b1	1
HM852792	HV*	HV	Caucasus	Azeri	Caucasus	Schoenberg et al. 2011	HV	1	no just HV0 plus 195	YES
HM852806	HV2a	HV-73	Caucasus	Azeri	Caucasus	Schoenberg et al. 2011	HV2a	0.7
HM852849	HV12a	HV_others	Turk		MiddleEast	Schoenberg et al. 2011	HV12a	1
HM852851	HV4b	HV4	Turk		MiddleEast	Schoenberg et al. 2011	HV4b	1
HM852859	HV9	HV_16311	Turk		MiddleEast	Schoenberg et al. 2011	HV9	1
HM852865	HV12a	HV_others	Turk		MiddleEast	Schoenberg et al. 2011	HV12a	1
HM852866	HV12a	HV_others	Turk		MiddleEast	Schoenberg et al. 2011	HV12a	1
HM852894	HV12a	HV_others	Georgia		Caucasus	Schoenberg et al. 2011	HV12a	1
HQ675034	HV4a1a3	HV4	Spain		SouthEurope	Seoane et al. 2011	HV4a1a3	1
HM036578	HV-73	HV-73	NA		NoInfo	Sharma et al. 2012	HV9c	0.4	from new Phylotree, could be HV20	YES
KC533522	HV12b1a	HV_others	NA		NoInfo	van der Walt et al.2012	HV12b1a	1
HM765457	HV0-195	HV0	NA		NoInfo	Zaragoza et al. 2010a	HV0	1
HM765460	HV4a1	HV4	NA		NoInfo	Zaragoza et al. 2010a	HV4a1	1
HQ593806	HV5	HV_others	NA		NoInfo	Zaragoza et al. 2010b	HV5	0.6
References:
Achilli A, Rengo C, Magri C, Battaglia V, Olivieri A, et al. 2004. The molecular dissection of mtDNA haplogroup H confirms that the Franco-Cantabrian glacial refuge was a major source for the European gene pool. Am J Hum Genet. 75:910-918.
Andrews RM, Kubacka I, Chinnery PF, Lightowlers RN, Turnbull DM, et al. 1999. Reanalysis and revision of the Cambridge reference sequence for human mitochondrial DNA. Nat Genet. 23:147.
Barbieri C, Vicente M, Oliveira S, Bostoen K, Rocha J, et al. 2014. Migration and interaction in a contact zone: mtDNA variation among Bantu-speakers in Southern Africa. PLoS One. 9:e99117.
Behar DM, Metspalu E, Kivisild T, Rosset S, Tzur S, et al. 2008. Counting the founders: the matrilineal genetic ancestry of the Jewish Diaspora. PLoS One. 3:e2062.
Behar DM, van Oven M, Rosset S, Metspalu M, Loogväli EL, Silva NM, et al. 2013. A “copernican” reassessment of the human mitochondrial DNA tree from its root. Am. J. Hum. Genet. 90:675–684.
Cardoso S, Valverde L, Alfonso-Sanchez MA, Palencia-Madrid L, Elcoroaristizabal X, et al. 2013. The expanded mtDNA phylogeny of the Franco-Cantabrian region upholds the pre-neolithic genetic substrate of Basques. PLoS One. 8:e67835.
Cerny V, Mulligan CJ, Fernandes V, Silva NM, Alshamali F, et al. 2011. Internal diversification of mitochondrial haplogroup R0a reveals post-last glacial maximum demographic expansions in South Arabia. Mol Biol Evol. 28:71-78.
Costa MD, Cherni L, Fernandes V, Freitas F, Ammar El Gaaied AB, et al. 2009. Data from complete mtDNA sequencing of Tunisian centenarians: testing haplogroup association and the "golden mean" to longevity. Mech Ageing Dev. 130:222-226.
Greenspan B. Family Tree DNA. Direct GenBank Submission.
Fedorova SA, Reidla M, Metspalu E, Metspalu M, Rootsi S, et al. 2013. Autosomal and uniparental portraits of the native populations of Sakha (Yakutia): implications for the peopling of Northeast Eurasia. BMC Evol Biol. 13:127.
Fendt L, Niederstätter H, Huber G, Zelger B, Dünser M, et al. 2011. Accumulation of mutations over the entire mitochondrial genome of breast cancer cells obtained by tissue microdissection. Breast Cancer Res Treat. 128:327-336.
Fraumene C, Belle EM, Castrì L, Sanna S, Mancosu G, et al. 2006. High resolution analysis and phylogenetic network construction using complete mtDNA sequences in sardinian genetic isolates. Mol Biol Evol. 23:2101-2111.
Garcia O, Fregel R, Larruga JM, Alvarez V, Yurrebaso I, et al. 2011. Using mitochondrial DNA to test the hypothesis of a European post-glacial human recolonization from the Franco-Cantabrian refuge. Heredity. 106:37-45.
Gasparre G, Porcelli AM, Bonora E, Pennisi LF, Toller M, et al. 2007. Disruptive mitochondrial DNA mutations in complex I subunits are markers of oncocytic phenotype in thyroid tumors. Proc Natl Acad Sci U S A. 104:9001-9006.
Gomez-Carballa A, Olivieri A, Behar DM, Achilli A, Torroni A, et al. 2012. Genetic continuity in the Franco-Cantabrian region: new clues from autochthonous mitogenomes. PLoS One. 7:e32851.
Ingman M, Kaessmann H, Pääbo S, Gyllensten U. 2000. Mitochondrial genome variation and the origin of modern humans. Nature. 408:708-713.
Jinam TA, Hong LC, Phipps ME, Stoneking M, Ameen M, et al. 2012. Evolutionary history of continental southeast Asians: "early train" hypothesis based on genetic analysis of mitochondrial and autosomal DNA data. Mol Biol Evol. 29:3513-3527.
Kloss-Brandstätter A, Schäfer G, Erhart G, Hüttenhofer A, Coassin S, et al. 2010. Somatic mutations throughout the entire mitochondrial genome are associated with elevated PSA levels in prostate cancer patients. Am J Hum Genet. 87:802-812.
Kong QP, Sun C, Wang HW, Zhao M, Wang WZ, et al. 2011. Large-scale mtDNA screening reveals a surprising matrilineal complexity in east Asia and its implications to the peopling of the region. Mol Biol Evol. 28:513-522.
Kujanová M, Pereira L, Fernandes V, Pereira JB, Černý V. 2009. Near eastern neolithic genetic input in a small oasis of the Egyptian Western Desert. Am J Phys Anthropol. 140:336-346.
Maca-Meyer N, Gonzalez AM, Larruga JM, Flores C, Cabrera VM. 2001. Major genomic mitochondrial lineages delineate early human expansions. BMC Genet. 2:13.
Malyarchuk B, Grzybowski T, Derenko M, Perkova M, Vanecek T, et al. 2008. Mitochondrial DNA phylogeny in Eastern and Western Slavs. Mol Biol Evol. 25:1651-1658.
Malyarchuk B, Derenko M, Perkova M, Vanecek T, Lazur J. 2009. Substitution patterns in human mitochondrial DNA control region as revealed by complete genome sequencing: an example of multiple back mutations in haplogroup V. GenBank: EU567452.567456.
Malyarchuk B, Derenko M, Denisova G, Kravtsova O. 2010. Mitogenomic diversity in Tatars from the Volga-Ural region of Russia. Mol Biol Evol. 27:2220-2226.
Musilova E, Fernandes V, Silva NM, Soares P, Alshamali F, et al. 2011. Population history of the Red Sea--genetic exchanges between the Arabian Peninsula and East Africa signaled in the mitochondrial DNA HV1 haplogroup. Am J Phys Anthropol. 145:592-598.
Olivieri A, Achilli A, Pala M, Battaglia V, Fornarino S, et al. 2006. The mtDNA legacy of the Levantine early Upper Palaeolithic in Africa. Science. 314:1767-1770.
Palanichamy MG, Sun C, Agrawal S, Bandelt HJ, Kong QP, et al. 2004. Phylogeny of mitochondrial DNA macrohaplogroup N in India, based on complete sequencing: implications for the peopling of South Asia. Am J Hum Genet. 75:966-978.
Palanichamy MG, Zhang CL, Mitra B, Malyarchuk B, Derenko M, et al. 2010. Mitochondrial haplogroup N1a phylogeography, with implication to the origin of European farmers. BMC Evol Biol. 10:304. doi: 10.1186/1471-2148-10-304.
Raule N, Sevini F, Li S, Barbieri A, Tallaro F, Lomartire L, et al. 2014. The co-occurrence of mtDNA mutations on different oxidative phosphorylation subunits, not detected by haplogroup analysis, affects human longevity and is population specific. Aging Cell. 13:401-407.
Schönberg A, Theunert C, Li M, Stoneking M, Nasidze I. 2011. High-throughput sequencing of complete human mtDNA genomes from the Caucasus and West Asia: high diversity and demographic inferences. Eur J Hum Genet. 2011 19:988-994.
Seoane M, Mosquera-Miguel A, Gonzalez T, Fraga M, Salas A, et al. 2011. The mitochondrial genome is a "genetic sanctuary" during the oncogenic process. PLoS One. 6:e23327.
Sharma V, Singh L, Thangaraj K, Nandan A, Sharma VK. 2012. Phylogenomic study of a concealed Ladakh tribe of the Great Himalayas. GenBank: HM036578.
van der Walt EM, Smuts I, Taylor RW, Elson JL, Turnbull DM, et al. 2012. Characterization of mtDNA variation in a cohort of South African paediatric patients with mitochondrial disease. Eur J Hum Genet. 20:650-656.
Zaragoza MV, Fass J, Diegoli M, Lin D, Arbustini E. 2010. Mitochondrial DNA variant discovery and evaluation in human Cardiomyopathies through next-generation sequencing. PLoS One. 5:e12295.
Zaragoza MV, Brandon MC, Diegoli M, Arbustini E, Wallace DC. 2011. Mitochondrial cardiomyopathies: how to identify candidate pathogenic mutations by mitochondrial DNA sequencing, MITOMASTER and phylogeny. Eur J Hum Genet. 19:200-207.
